1 **Bidirectional and reciprocal control of astrocyte free calcium by modest**  
2 **fluctuations in external potassium**

3  
4 Institoris A.\*, Shin S.\*, Weilinger N.L., Gorzo K., Mehina E., Haidey J., MacVicar B.A. and  
5 Gordon G.R.

6  
7 *Hotchkiss Brain Institute, Department of Physiology and Pharmacology, Cumming School of*  
8 *Medicine, University of Calgary, AB, Calgary, Canada*  
9

10  
11 \*authors contributed equivalently  
12  
13  
14

15 Corresponding Author:

16  
17 Grant R. Gordon  
18 [gordong@ucalgary.ca](mailto:gordong@ucalgary.ca)  
19 Room 1B40A, Building HRIC  
20 3330 Hospital Dr. NW  
21 Calgary, AB, Canada  
22 T2N 4N1  
23  
24

25 Running Title: External K<sup>+</sup> controls astrocyte free Ca<sup>2+</sup>  
26

27 Figures: 7

28 Words in Abstract: 180

29 Words in Introduction: 543

30 Words in Discussion: 1604

31 Character count including spaces (not including methods or references): ~48,150  
32  
33

34 **Keywords:** astrocyte; calcium; potassium; two-photon; FLIM; brain slice; in vivo;  
35 arteriole  
36  
37  
38

39 **Conflict of Interest:** The authors declare no conflict of interest with regard to any  
40 aspect of this work.  
41

42 **Acknowledgements:** The Canada Institutes of Health Research (CIHR) supported this  
43 study (FDN-148471). Canada Research Chairs (CRC) supported GRG. SS, EM, KG  
44 and JH were supported by the Hotchkiss Brain Institute. EM was additionally supported  
45 by CIHR. WN is supported by CIHR and Banting Fellowships, BAM is supported by  
46 CRC and CIHR (FDN148397). We acknowledge the developers and distributors of  
47 ScanImage software through the HHMI/Janelia Farms Open Source License.

48  
49  
50  
51  
52  
53  
54  
55  
56  
57  
58  
59  
60  
61  
62  
63  
64  
65  
66  
67  
68  
69  
70  
71  
72  
73  
74  
75  
76  
77  
78  
79  
80

**Abstract**

Astrocytes sense and respond to changes in the concentration of extracellular  $K^+$ , and separately contribute to multiple physiological processes through  $Ca^{2+}$  dependent mechanisms. Yet, whether a modest change in  $[K^+]_o$  impacts astrocyte free  $Ca^{2+}$  remains unclear. Using relative or quantitative two-photon fluorescence  $Ca^{2+}$  imaging in acute brain slices or *in vivo* in the somatosensory cortex from Sprague Dawley rats and C57Bl/6 mice, we showed that changes to external  $K^+$  (+/- 1mM to 2.5mM) reciprocally controls the astrocyte Rhod-2 or OGB-1  $Ca^{2+}$ -dependent fluorescence in the soma, major processes and endfeet. The astrocyte  $Ca^{2+}$  decrease when  $[K^+]_o$  was elevated was sensitive to lowering the external concentration of  $Ca^{2+}$ ,  $Cl^-$ , and  $HCO_3^-$ , but not  $Na^+$ . Unexpectedly, the phenomenon was blocked by inhibiting K-Cl cotransport. Picrotoxin induced ictal neural activity drove an analogous decrease of astrocyte  $Ca^{2+}$ .  $K^+$  mediated cerebral arteriole dilation in brain slices was also sensitive to inhibiting K-Cl cotransport as well as whole-cell patching a peri-arteriole astrocyte which perturbs normal  $Ca^{2+}$ ,  $Cl^-$  and  $HCO_3^-$  concentration gradients. These data reveal subtle, bidirectional regulation of astrocyte free  $Ca^{2+}$  via fluctuations of  $[K^+]_o$  within the physiological range.

## 81 Introduction

82 Astrocytes are important sensors and regulators of the extracellular milieu, including potassium  
83 ( $K^+$ ) homeostasis. How changes in the external  $K^+$  concentration impact brain function have  
84 been investigated for over 80 years. Early measurements using  $K^+$ -selective microelectrodes  
85 showed that external  $K^+$  fluctuates around 3mM *in vivo* (Somjen, 1979) and that physiological  
86 neuronal action potential firing raises  $[K^+]_o$  typically from baseline by 0.1-1mM (Kelly and Van  
87 Essen, 1974; Syková et al., 1974; Singer and Lux, 1975; Korytová, 1977). Similar sized shifts in  
88 baseline extracellular  $K^+$  are observed switching between sleep and wake states (Ding et al.,  
89 2016), but higher elevations likely occur in microenvironments. Postsynaptic NMDA receptor  
90 opening elevates extracellular  $K^+$  with elevations modelled to reach between 5-7 mM for tens of  
91 milliseconds in the synaptic cleft (Shih et al., 2013). Astrocytes help take up these  $[K^+]_o$   
92 increases via  $Na^+/K^+$  ATPase and  $K_{ir}$  4.1 channel activity (Hertz et al., 2015; Chever et al., 2010)  
93 to help maintain neuronal ionic gradients (Kofuji and Newman, 2004)(Hertz et al., 2015)(Chever  
94 et al., 2010). Astrocytes also depolarize to elevated  $[K^+]_o$  which drives  $HCO_3^-$  influx via the  
95 electrogenic  $Na^+/HCO_3^-$  cotransporter. This increases intracellular pH ( $pH_i$ ) (Ransom et al.,  
96 2000; Larsen and MacAulay, 2017) and causes downstream activation of soluble adenylyl  
97 cyclase (Choi et al., 2012). However, changes within or just beyond physiological levels of  $[K^+]_o$   
98 are not thought to affect astrocyte  $Ca^{2+}$  signaling, until pathological levels of  $[K^+]_o$  (~20mM) are  
99 reached (Duffy and MacVicar, 1994).

100 Indeed, astrocytes regulate an array of physiological functions through changes in free  
101 cytosolic  $Ca^{2+}$ , including synaptic strength (Fiacco and McCarthy, 2004; Henneberger et al.,  
102 2010) and local cerebral blood flow (Mulligan and MacVicar, 2004; Takano et al., 2006;  
103 Rosenegger et al., 2015; Mishra et al., 2016; Haidey et al., 2021). While most studies have  
104 focused on large amplitude, transmitter evoked  $Ca^{2+}$  transients in astrocytes, a multitude of  
105 different types of  $Ca^{2+}$  signals likely exist in these cells (Srinivasan et al., 2015; Agarwal et al.,  
106 2017; Haidey et al., 2021) that are incompletely understood. For example, changes to the  
107 resting, or steady-state free  $[Ca^{2+}]_i$  concentration in astrocytes is seldom explored. This is  
108 important because astrocytes have a relatively high resting free  $Ca^{2+}$  concentration in the soma  
109 and major processes (Zheng et al., 2015) and relatively small deviations from resting  $Ca^{2+}$  can  
110 impact gliotransmission (Parpura and Haydon, 2000; Shigetomi et al., 2012). Resting astrocyte  
111  $Ca^{2+}$  can be modulated by changes in plasma membrane  $Ca^{2+}$  flux (Agarwal et al., 2017;  
112 Rungta et al., 2016; Shigetomi et al., 2011), arteriole tone (Haidey et al., 2021; Kim et al., 2015)  
113 or dopamine (Jennings et al., 2017). Additionally, bursts of afferent activity decrease steady-  
114 state astrocyte  $Ca^{2+}$  in an NMDA receptor-dependent manner (Mehina et al., 2017). As NMDA

115 receptor opening (Shih et al., 2013) or neuromodulators (Ding et al., 2016) can affect the  
116 external potassium concentration, we tested the hypothesis modest changes in  $[K^+]_o$  regulate  
117 the resting  $[Ca^{2+}]_i$  in astrocytes. This exploration is needed because a small shift in astrocyte  
118 free  $Ca^{2+}$  may have been previously overlooked using standard fluorescence techniques to  
119 measure  $Ca^{2+}$  that did not account for the changes to astrocyte volume that accompany  
120 changes in  $[K^+]_o$  (Florence et al., 2012).

121

## 122 **Results**

### 123 **Modest changes in $[K^+]_o$ reciprocally shifts free $[Ca^{2+}]_i$ in astrocytes**

124 Using two-photon fluorescence imaging, we bath applied isosmotic high  $[K^+]_o$  solutions onto  
125 acute slices of the somatosensory cortex from Sprague Dawley rats. Slices were bulk loaded  
126 with the bright, relatively high-affinity  $Ca^{2+}$  indicator Rhod-2/AM, along with the morphological  
127 dye Calcein/AM. We took the ratio of the normalized Rhod-2 fluorescence signal over the  
128 normalized Calcein fluorescence signal to correct for apparent decreases in  $Ca^{2+}$  that were the  
129 result of cell swelling (Florence et al., 2012) (Figure 1A). Indeed, we observed decreases in both  
130 the Rhod-2  $Ca^{2+}$  signal and Calcein signal in response to a +2.5mM  $[K^+]_o$  challenge (going from  
131 2.5mM to 5mM  $K^+$ ), yet interestingly, the drop in Rhod-2 fluorescence was nearly double that of  
132 the morphological fluorescence (Figure 1B). This suggested a decrease in  $[Ca^{2+}]_i$  beyond that  
133 predicted by a cell volume increase alone. The Rhod-2/Calcein ratio revealed consistent and  
134 significant decreases in astrocyte steady-state  $Ca^{2+}$  when  $[K^+]_o$  was increased by +2.5mM to 5  
135 mM ( $0.83 \pm 0.1$ ,  $n=9$  slices,  $p=0.001$ , Figure 1C-E). Even smaller challenges of only +1mM  
136 (increasing  $[K^+]_o$  from 2.5mM to 3.5mM) decreased  $Ca^{2+}$  ( $0.88 \pm 0.01$ ,  $n=4$ ,  $p=0.002$ , Figure 1H)  
137 but to a lesser degree than a +2.5mM challenge. Moving beyond the physiological range, a  
138 +5mM challenge (2.5 to 7.5mM) caused a proportionally larger drop in astrocyte  $Ca^{2+}$  ( $0.66 \pm$   
139  $0.02$ ,  $n=4$ ,  $p=0.002$ , Figure 1H). Observations of up and down shifts in  $[K^+]_o$  *in vivo* (Ding et al.,  
140 2016), let us to test whether decreasing  $[K^+]_o$  would produce an opposite effect. For this  
141 experiment, we maintained our slices in 3.5mM  $K^+$  and decreased  $[K^+]_o$  to 2.5mM (-1mM  $K^+$   
142 challenge) and found a significant increase in astrocyte free  $Ca^{2+}$  ( $1.09 \pm 0.02$ ,  $n=5$ ,  $p=0.007$ ,  
143 Figure 1F,G)(dose response summary Figure 1H). These data suggest that external  $[K^+]_o$   
144 controls the resting free  $Ca^{2+}$  concentration in astrocytes in a bidirectional manner.

145 We confirmed a previously described volume increase in astrocytes to a modest  
146 elevation in  $[K^+]_o$ . A +2.5mM  $[K^+]_o$  challenge increased soma area ( $1.12 \pm 0.01$ ,  $p=0.001$ ,  $n=6$ ,  
147 Figure 1I,J, L), which also supported our observed decrease in the morphological Calcein  
148 signal. However, expanding on previous findings, we found these volume changes were

149 bidirectional in nature and occurred in response to smaller changes in  $[K^+]_o$ , similar to what we  
 150 observed for astrocyte  $Ca^{2+}$ . For example, a  $-1mM [K^+]_o$  test, decreased soma area (Figure 1K).  
 151 Collectively, these data show that  $[K^+]_o$  within and slightly beyond the physiological range  
 152 bidirectionally controls free  $Ca^{2+}$  in astrocytes, more so than expected from volume changes  
 153 alone.

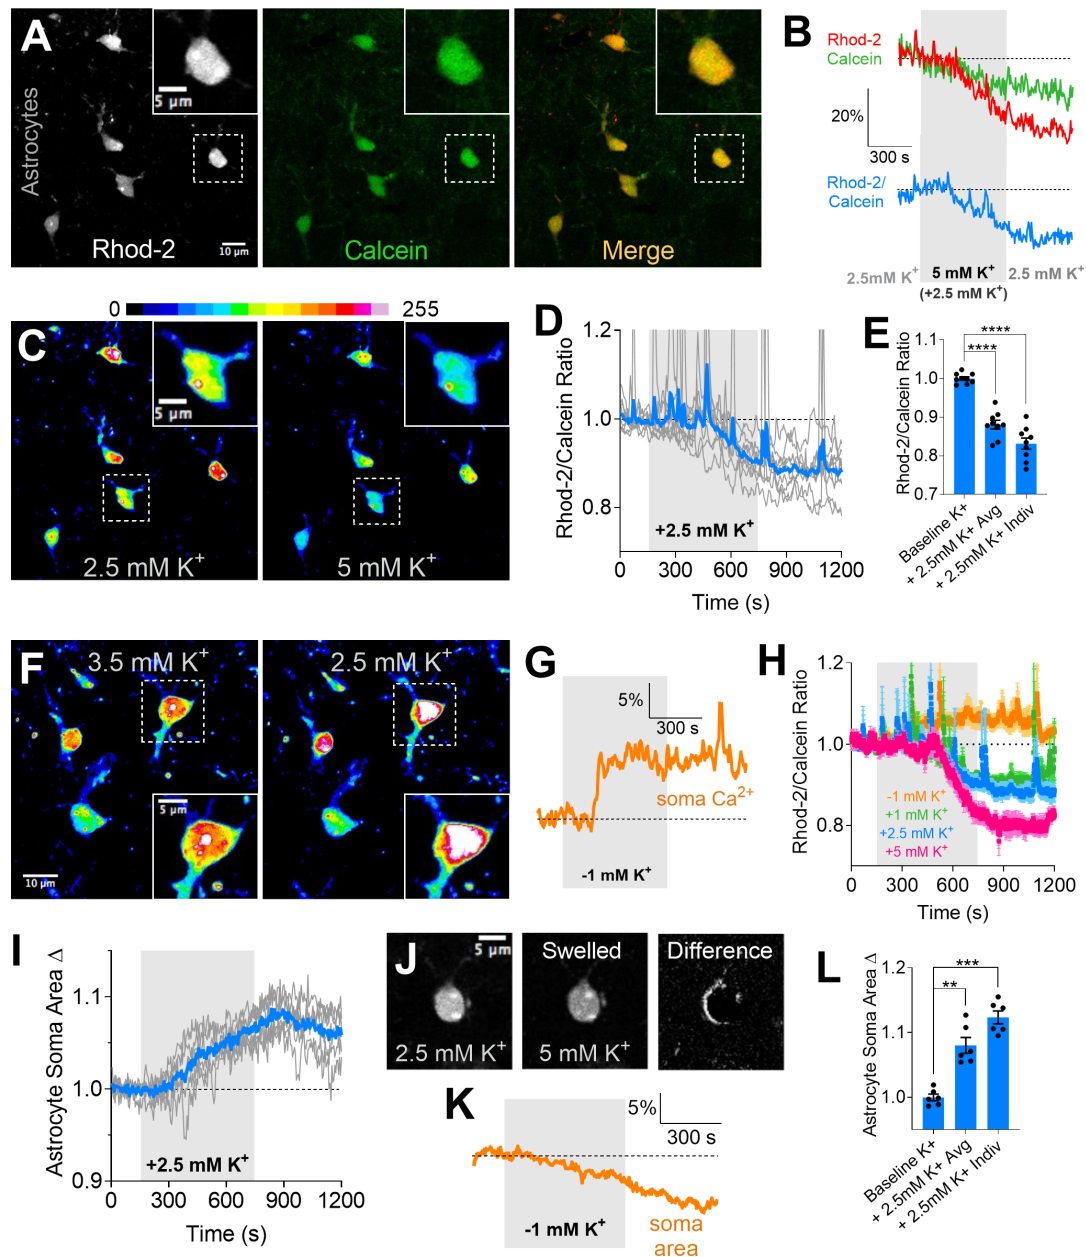

154  
 155  
 156

157 **Figure 1: Modest changes in external  $[K^+]_o$  bidirectionally control astrocyte free  $Ca^{2+}$  and**  
158 **soma volume.**

159 **A)** Astrocytes in an acute somatosensory cortical brain slice co-loaded with Rhod-2/AM (left)  
160 and Calcein/AM (middle), merge (right). Inset images show a close-up of a single astrocyte  
161 soma. **B)** Normalized Rhod-2 and Calcein traces (upper) measured from an astrocyte soma  
162 and the corresponding ratio (lower) in response to a modest  $[K^+]_o$  challenge (+2.5mM): from  
163 2.5mM to 5mM (grey bar) back to 2.5mM. **C)** Pseudo coloured Rhod-2 images showing the  
164 decrease in  $Ca^{2+}$  signal to a +2.5mM  $[K^+]_o$  increase. **D)**  $Ca^{2+}$  trace summary showing individual  
165 experiment traces (grey) and overall average (blue, without error). **E)**  $Ca^{2+}$  summary showing  
166 the average peak effect (same time point for all) and the peak of effect of individual experiments  
167 (peaks at different time points for each) for the +2.5mM  $[K^+]_o$  increase. **F)** Pseudo coloured  
168 Rhod-2 images showing the increase in astrocyte  $Ca^{2+}$  signal to a -1.0mM  $[K^+]_o$  decrease. **G)**  
169  $Ca^{2+}$  trace from a single experiment showing the  $Ca^{2+}$  increase from a  $[K^+]_o$  decrease of 1mM.  
170 **H)**  $Ca^{2+}$  summary trace data of the dose response to  $[K^+]_o$  changes, showing bidirectional  
171 effects. **I)** Astrocyte soma area measures showing individual experiment traces (grey) and  
172 overall average (blue, without error) to the +2.5mM  $[K^+]_o$  challenge. **J)** Images depicting the  
173 soma volume increase. Difference image subtracts the large volume astrocyte from the small  
174 volume state. **K)** Soma area trace from one experiment showing a decrease in cell area when  
175  $[K^+]_o$  is decreased by 1mM (3.5 to 2.5mM). **L)** Soma area summary showing the average peak  
176 effect (same time point) and the peak of effect of individual experiments (different time point for  
177 each) for the +2.5mM  $[K^+]_o$  increase experiments. Data is mean +/- SEM, paired two-tailed, t-  
178 tests. \*\* p<0.01, \*\*\* p<0.001

179

180

181 **FLIM reveals  $[K^+]_o$ -mediated decrease in astrocyte free  $[Ca^{2+}]_i$**

182 To test the idea that a modest increase in external  $K^+$  causes a bona-fide decrease in the free  
183  $Ca^{2+}$  concentration in astrocytes, we performed two-photon Fluorescence Lifetime Imaging  
184 Microscopy (FLIM)(Figure 1A). This is a quantitative method for assessing cell  $[Ca^{2+}]_i$  in which  
185 measurements are independent of dynamic changes in dye concentration, photobleaching or to  
186 changes in optical properties of tissue. We used the high affinity, FLIM-sensitive  $Ca^{2+}$  indicator  
187 OGB-1 to circumvent potential problems associated with relative two-photon fluorescence  
188 intensity measurements using Rhod-2 and Calcein during  $K^+$ -induced astrocyte swelling. Our  
189 calibration of the OGB-1 FLIM decay to various levels of free  $[Ca^{2+}]_i$  in solution (see methods)  
190 placed the  $K_d$  at 192 nM (Figure 2C), ideal to detect small shifts in resting astrocyte free  $[Ca^{2+}]_i$ .  
191 We patch loaded single astrocytes with OGB-1, which readily diffused to neighboring astrocytes  
192 that were coupled via gap junctions to the patched cell. We allowed 10 min for OGB-1 diffusion  
193 through the astrocyte network. As previously reported (Zheng et al., 2015), the patched  
194 astrocyte displayed elevated resting  $[Ca^{2+}]_i$  compared to the adjacent gap junction (GJ) coupled  
195 astrocytes (patched soma:  $115.6 \pm 9.7$  nM; GJ soma:  $69.5 \pm 5.5$  nM, n=8, p=0.003, Figure  
196 2B,D,E). Similar to our results using the Rhod-2/Calcein ratio, bath application of an isosmotic  
197 +2.5mM  $K^+$  challenge (2.5 to 5mM  $K^+$ ) decreased the OGB-1 FLIM  $Ca^{2+}$  signal (shortened the

198 mean lifetime) in the soma and major processes of both the patched astrocyte and coupled  
 199 astrocytes (normalized GJ somata:  $0.72 \pm 0.05$ ,  $n=8$   $p=0.001$ ; Figure 2B,D,E). We also noted a  
 200 decreased resting  $[Ca^{2+}]_i$  level in astrocytic perivascular endfeet (normalized:  $0.71 \pm 0.04$ ,  
 201  $p=0.008$ ,  $n=4$ , Figure 2F,G), in response to high  $[K^+]_o$ . We then examined astrocytic endfeet  
 202 apposed to blood vessels using our Rhod-2/Calcein approach and observed a similar decrease  
 203 in  $Ca^{2+}$  caused by  $+2.5mM$  high  $[K^+]_o$  ( $0.74 \pm 0.01$ ,  $n=3$ , Figure 2H,I) and clear endfoot swelling  
 204 (Figure 2J). These data suggest that a modest elevation in external  $K^+$  causes a genuine  
 205 decrease in the free  $Ca^{2+}$  concentration in astrocytes in multiple large cellular compartments.

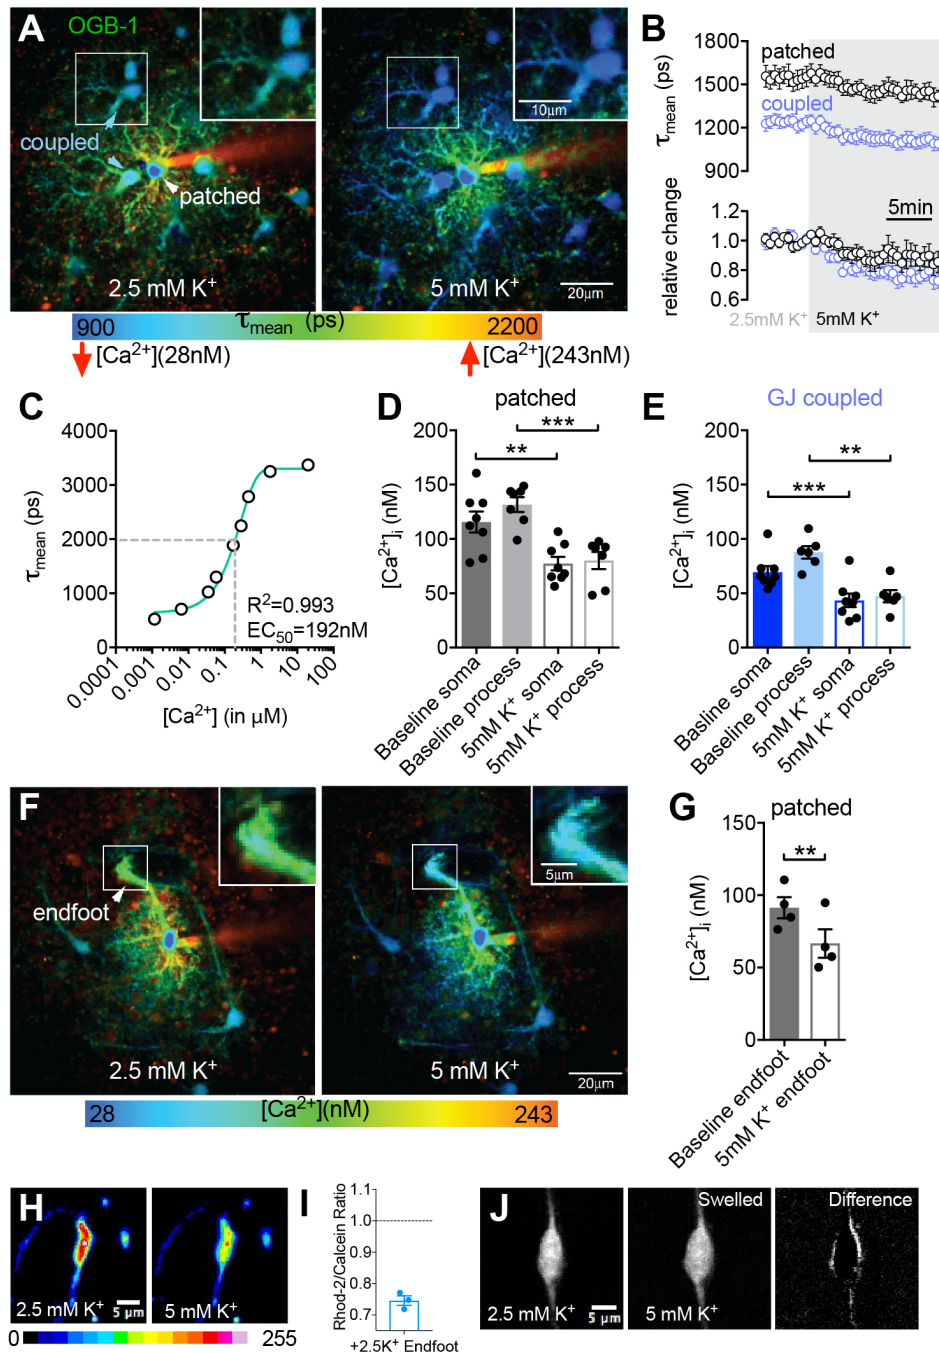

206 **Figure 2: Fluorescence Lifetime Imaging Microscopy (FLIM) reveals a quantitative**  
207 **decrease in astrocyte free  $\text{Ca}^{2+}$  in response to a modest elevation in external  $\text{K}^+$ .**  
208 **A)** Two-photon FLIM image sequence showing a patched astrocyte loaded with OGB-1, and  
209 coupled astrocyte also loaded, in response to a +2.5mM  $\text{K}^+$  increase. Pseudo colouring  
210 corresponds to the tau mean of the lifetime decay curves (cooler colours: faster decay = lower  
211  $\text{Ca}^{2+}$ ; warmer colours: slower decay = higher  $\text{Ca}^{2+}$ ). High  $\text{K}^+$  results in a shift towards faster  
212 lifetimes (cooler colours) thus decreased free  $\text{Ca}^{2+}$  in both the patched astrocyte and the  
213 coupled astrocytes. **B)** (Upper) Raw, averaged OGB-1 lifetimes from patched astrocytes (black)  
214 and coupled astrocytes (blue) over time in response to high  $\text{K}^+$ . (Lower) Normalized lifetime  
215 values over time for the same data. **C)** OGB-1 Lifetime- $\text{Ca}^{2+}$  concentration calibration curve. **D)**  
216 Summary of  $\text{Ca}^{2+}$  concentrations in patched astrocyte somata and major processes before and  
217 during high  $\text{K}^+$ . **E)** Summary of  $\text{Ca}^{2+}$  concentrations in coupled astrocyte somata and major  
218 processes before and during high  $\text{K}^+$ . **F)** FLIM images of a patched, peri-vascular astrocyte  
219 before and during high  $\text{K}^+$ , inset shows endfoot. **G)** Summary of  $\text{Ca}^{2+}$  concentrations in patch  
220 loaded endfeet before and during high  $\text{K}^+$ . **H)** Rhod-2 images showing the drop in astrocyte  
221  $\text{Ca}^{2+}$  occurs in perivascular endfeet. **I)** Rhod2/Calcein ratio endfoot summary data. **J)** Images  
222 show an endfoot swelling in response to high  $\text{K}^+$ . Data is mean +/- SEM, paired two-tailed t-  
223 tests, \*\*  $p < 0.01$ , \*\*\*  $p < 0.001$

224

## 225

### 226 **Elevated $[\text{K}^+]_o$ decreases astrocyte $\text{Ca}^{2+}$ *in vivo***

227 We sought to confirm whether the decrease in astrocyte free  $\text{Ca}^{2+}$  to high  $[\text{K}^+]_o$  occurred under  
228 realistic conditions *in vivo*. We used an awake, but lightly sedated mouse model in which mice  
229 were head-fixed under the two-photon microscope (Bonder and McCarthy, 2014). Using  
230 chlorprothixene (2mg/kg), animals remain calm but awake during imaging. Furthermore, by  
231 using perforated cranial windows (Tran et al., 2018), we could superfuse isotonic high  $\text{K}^+$   
232 solutions onto the surface of neocortex through a ~600 micron diameter hole, while imaging  
233 within the hole itself. Though a +/-1mM  $\text{K}^+$  change could be detected in acute slices, there is a  
234 well appreciated diffusion barrier for superfusion experiments on the neocortical surface  
235 crossing the pia mater, even with dura removal. Therefore, we attempted to measure changes  
236 in the astrocyte  $\text{Ca}^{2+}$  level in response to a 10mM  $\text{K}^+$  solution. Indeed, elevating  $\text{K}^+$  in this  
237 manner again resulted in a prominent decrease in Rhod-2 fluorescence in astrocyte somas and  
238 other major compartments that were within the coverglass hole in the superficial neocortex ( $0.69$   
239  $\pm 0.03$ ,  $N=3$ ,  $p = 0.006$ , Figure 3). Though these experiments were not controlled for by Calcein  
240 co-loading, we observed little astrocyte swelling *in vivo* ( $1.01 \pm 0.03$ ,  $N=3$ ). These data  
241 demonstrate a similar astrocyte phenomenon *in vivo*, to our effects reported in acute brain  
242 slices. They also suggest there is a drop in free  $\text{Ca}^{2+}$  independent of dilution from swelling.

243

244

245



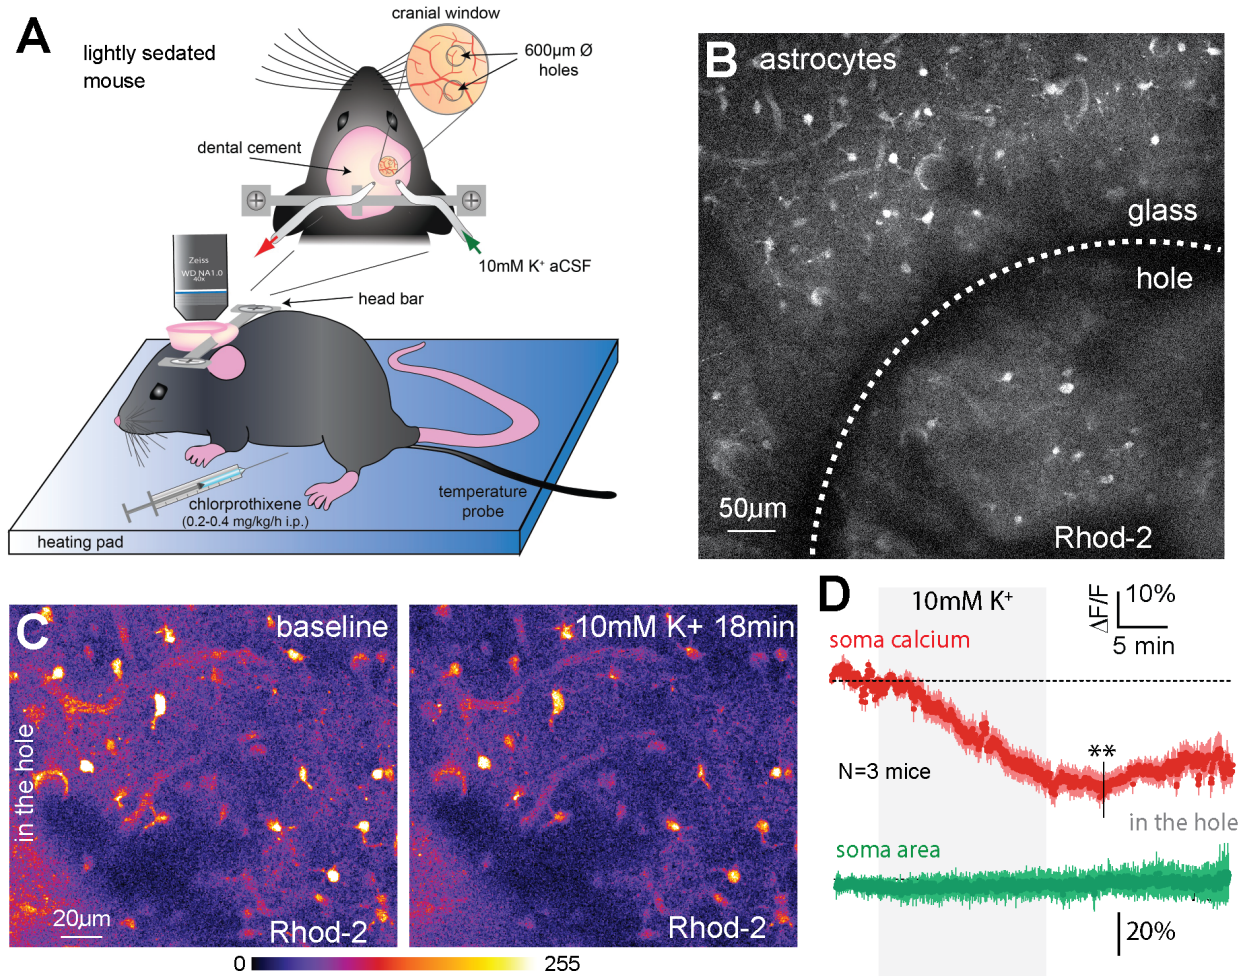

246

247

**Figure 3: Elevated  $[K^+]_o$  decreases astrocyte  $Ca^{2+}$  *in vivo***

248

**A)** Schematic of lightly sedated mouse *in vivo* setup. High  $K^+$  solution is superfused onto the

249

surface of the brain via a perforated cranial window. **B)** Large field of view two-photon image of

250

Rhod-2/AM loaded astrocytes, showing astrocytes located either within the coverglass hole or

251

underneath the coverglass. **C)** Images of before and during treatment of 10mM  $K^+$ . LUT

252

coloured astrocytes show a decrease in Rhod-2 signal during high  $K^+$ . **D)** Averaged trace data

253

showing the decrease in astrocyte Rhod-2 signal in 14 astrocytes across 3 different mice in

254

response to 10mM  $K^+$ . In contrast, astrocytes soma area did not increase. Measurements were

255

taken from astrocytes located within the coverglass hole. Data is mean  $\pm$  SEM, paired two-

256

tailed t-tests, \*\*  $p < 0.01$ .

257

258

259

260

261

262

263

264

265 **The K<sup>+</sup>-induced change to astrocyte free Ca<sup>2+</sup> is not plastic**

266 We extended the time frame of our K<sup>+</sup> experiment and examined the washout period using  
267 Rhod-2 and Calcein. We observed a complete washout of the Ca<sup>2+</sup> drop to a +2.5mM [K<sup>+</sup>]<sub>o</sub>.  
268 challenge (Supplementary Figure 1A). As a shift in [K<sup>+</sup>]<sub>o</sub> of this magnitude has little impact on  
269 neural excitability (Somjen, 1979), we confirmed that the K<sup>+</sup>-induced drop in astrocyte Ca<sup>2+</sup> was  
270 insensitive to TTX (500nM) (Supplementary Figure 1B). Theta-burst afferent synaptic activity  
271 also decreases astrocyte steady-state Ca<sup>2+</sup>, and this effect is occluded in enriched animals  
272 (Mehina et al., 2017). With a complete washout of the K<sup>+</sup> effect and no reliance on neural action  
273 potential firing, we tested whether the K<sup>+</sup>-induced decrease in astrocyte Ca<sup>2+</sup> would be unaltered  
274 after enrichment. Five Sprague Dawley rats were housed in an enrichment environment for  
275 three weeks (see methods) before acute slices were prepared and the same +2.5mM [K<sup>+</sup>]<sub>o</sub>.  
276 experiment was conducted. We found that enrichment had no effect (p=0.24) on the magnitude  
277 of the astrocyte Ca<sup>2+</sup> decrease to high K<sup>+</sup> when compared to our control data set  
278 (Supplementary Figure 1C-F). These data suggest that the astrocyte free Ca<sup>2+</sup> decrease  
279 following a modest elevation in [K<sup>+</sup>]<sub>o</sub> neither depends on changes in neural activity nor on long-  
280 lasting plastic mechanisms. Given the bidirectional nature of the effect described above, these  
281 data collectively suggest that changes to steady-state [K<sup>+</sup>]<sub>o</sub> reciprocally controls steady-state  
282 free Ca<sup>2+</sup> in astrocytes: when [K<sup>+</sup>]<sub>o</sub> is elevated, astrocyte free Ca<sup>2+</sup> decreases and when [K<sup>+</sup>]<sub>o</sub> is  
283 decreased, astrocyte free Ca<sup>2+</sup> increases.

284

285 **The decrease in astrocyte Ca<sup>2+</sup> to moderate high K<sup>+</sup> requires external Ca<sup>2+</sup> and**  
286 **Bicarbonate**

287 These observations directed us to explore whether external K<sup>+</sup> affected the movement of Ca<sup>2+</sup>  
288 across the astrocyte plasma membrane or the endoplasmic reticulum. It is well appreciated that  
289 increases in external K<sup>+</sup> depolarize the astrocyte resting membrane potential which is  
290 predominately controlled by E<sub>K</sub>. Depolarizing membrane potential would decrease the driving  
291 force for Ca<sup>2+</sup> entry, as well as alter the activity of electrogenic transporters. We tested whether  
292 the K<sup>+</sup> effect relied on an external Ca<sup>2+</sup> source or an internal one. Brain slices were pre-  
293 incubated with the potent SERCA pump inhibitor thapsigargin (1μM) for 30min to deplete  
294 intracellular Ca<sup>2+</sup> stores. After this treatment we were unable to evoke large glutamate-mediated  
295 Ca<sup>2+</sup> transients in astrocytes (Mehina et al., 2017). In this condition, a +2.5mM [K<sup>+</sup>]<sub>o</sub> challenge  
296 still produced a Ca<sup>2+</sup> decrease (p=0.21) measured by the Rhod-2/Calcein ratio (0.81 ± 0.01,  
297 n=11, Figure 4A,B), suggesting Ca<sup>2+</sup> stores were not involved. In contrast, incubating our slices  
298 in a Ca<sup>2+</sup> free ACSF external solution, significantly attenuated both the drop in free Ca<sup>2+</sup> (0.90 ±

299 0.01,  $p=0.0015$ ,  $n=8$ , Figure 4C,E,F) and astrocyte swelling ( $1.07 \pm 0.01$ ,  $p=0.001$ ,  $n=7$ , Figure  
300 4D,G,H) that normally occurred in response to high  $[K^+]_o$ .

301 Bicarbonate movement into astrocytes plays a major role in volume regulation (Florence  
302 et al., 2012; Larsen and MacAulay, 2017) and pH alkalization  
303 (Ransom et al., 2000; Zhou et al., 2010; Larsen and MacAulay, 2017) during  $K^+$  challenges. To  
304 test whether bicarbonate affected astrocyte  $Ca^{2+}$ , we substituted bicarbonate with HEPES in the  
305 ACSF. Notably, in bicarb-free conditions, a  $+2.5mM K^+$  challenge failed to decrease astrocyte  
306 free  $Ca^{2+}$  ( $0.96 \pm 0.01$ ,  $p=0.001$ ,  $n=6$ , Figure 4I-K) and, as previously reported, blocked cell  
307 swelling ( $1.04 \pm 0.01$ ,  $p=0.001$ ,  $n=5$ , Figure 4L,M). Cell swelling also depends on the pH change  
308 via the action of carbonic anhydrase (Florence et al., 2012) but a reliance on pH for  $Ca^{2+}$   
309 changes is unclear. We found that blocking carbonic anhydrase activity with acetazolamide  
310 ( $100 \mu M$ ) had no impact on the drop in astrocyte  $Ca^{2+}$  observed in response to high  $[K^+]_o$  ( $0.80 \pm$   
311  $0.01$ ,  $p=0.24$ ,  $n=5$ , Figure 5N,O). These data suggest that bicarbonate, but not pH per se, plays  
312 an important role in the free  $Ca^{2+}$  decrease observed in response to a modest  $[K^+]_o$  increase.

313  
314  
315  
316  
317  
318  
319  
320  
321  
322  
323  
324  
325  
326  
327  
328  
329  
330  
331  
332  
333  
334  
335  
336  
337  
338  
339  
340

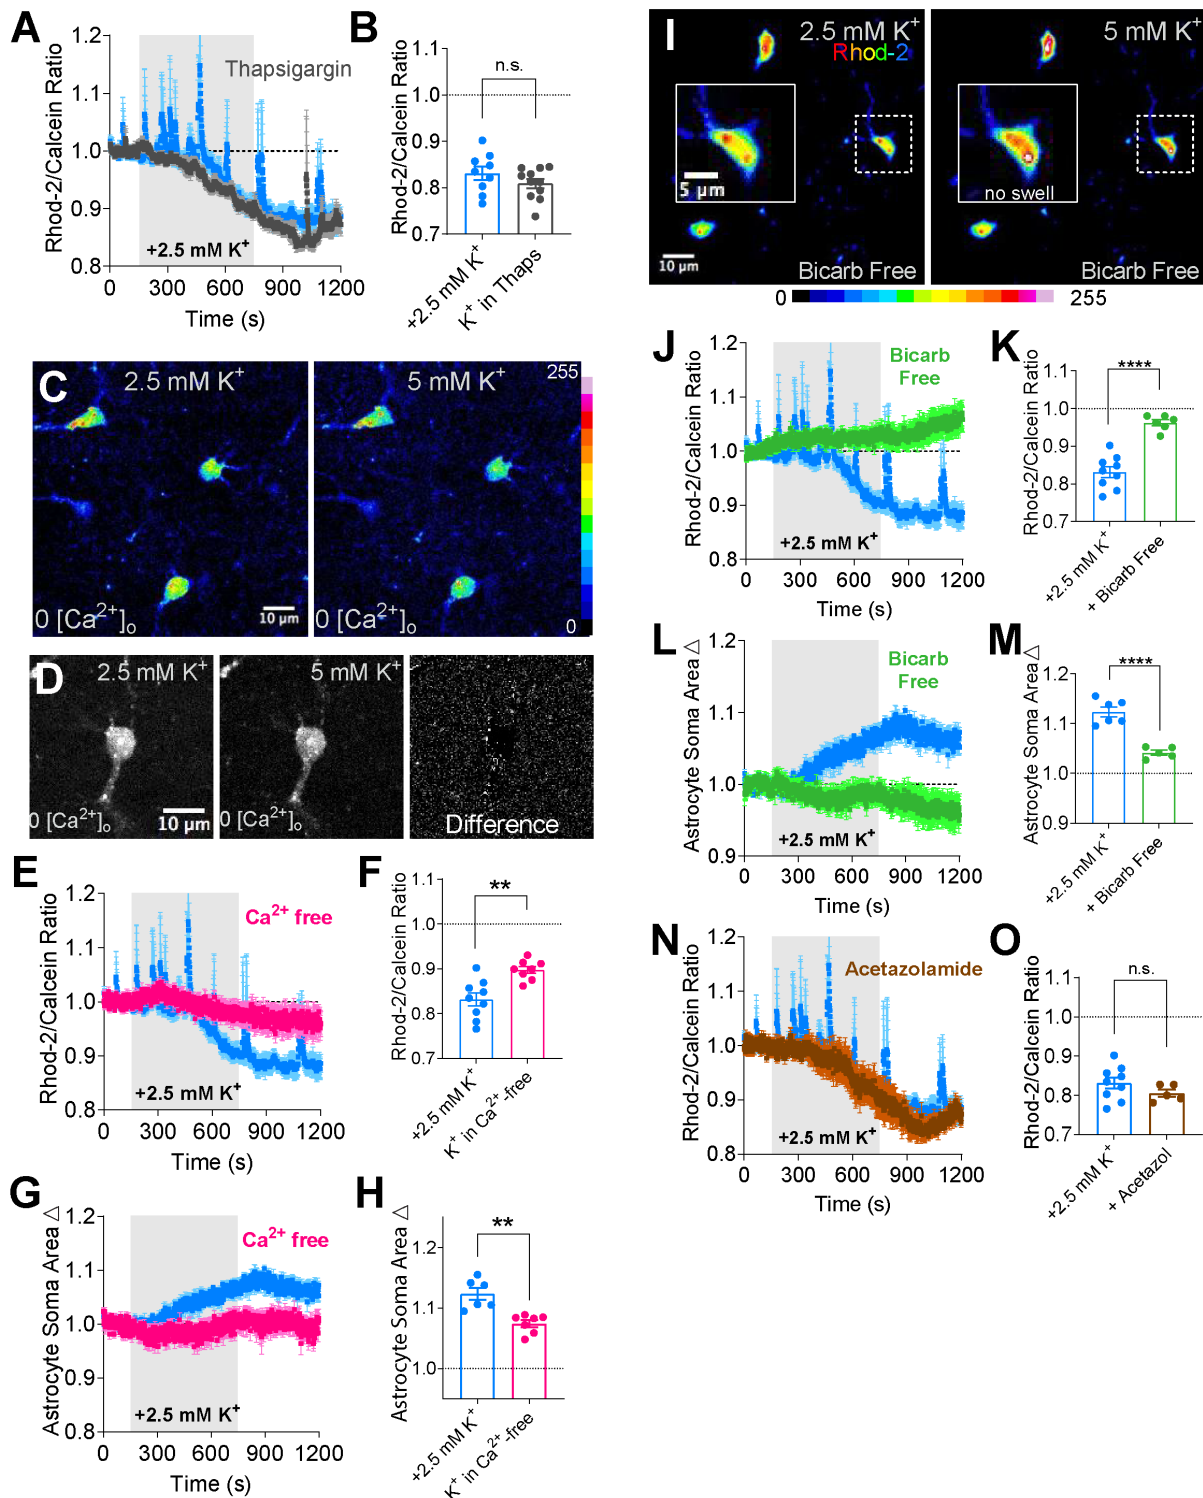

341  
342  
343  
344  
345  
346

347 **Figure 4: The  $[K^+]_o$  effect on astrocytes depends external  $Ca^{2+}$  and Bicarbonate**  
348 **A)** Average summary time series  $Ca^{2+}$  data showing no effect on the  $K^+$ -mediated decrease  
349 when internal  $Ca^{2+}$  stores are emptied with a 30min pretreatment with the SERCA pump  
350 inhibitor thapsigargin (1  $\mu$ M). **B)** Summary of the peak decreases in  $Ca^{2+}$  from individual  
351 experiments. **C)** Pseudo coloured two-photon images of astrocytes loaded with Rhod-2 in a  
352  $Ca^{2+}$  free external solution. A +2.5mM  $K^+$  challenge produced little change to resting astrocyte  
353  $Ca^{2+}$ . **D)** Image of an astrocyte at baseline  $K^+$  (left), elevated  $K^+$  (middle) and a difference image  
354 (5mM  $K^+$  minus 2.5mM  $K^+$ ) showing little change to astrocyte soma area in response to high  $K^+$   
355 in zero external  $Ca^{2+}$ . **E)** Average summary time series  $Ca^{2+}$  data in response to high  $K^+$  in a  
356  $Ca^{2+}$  free external solution. **F)** Summary data of the maximal decrease in astrocyte  $Ca^{2+}$  in each  
357 experiment. **G)** Average summary time series soma area data in response to high  $K^+$  in a  $Ca^{2+}$   
358 free external solution. **H)** Summary data of the maximal increase in astrocyte soma area in  
359 each experiment. **I)** Pseudo coloured two-photon images of astrocytes loaded with Rhod-2,  
360 showing no decrease in free  $Ca^{2+}$  to a +2.5mM  $K^+$  challenge when bicarbonate is removed from  
361 the external solution (HEPES buffered). Inset shows an astrocyte close up and the lack of cell  
362 swelling to high  $[K^+]_o$  in a bicarb free external solution. **J)** Summary time series of Rhod-  
363 2/Calcein ratio  $Ca^{2+}$  data of the same experiment in (I) compared to control. **K)** Summary data of  
364 peak decreases in  $Ca^{2+}$  from each experiment. **L)** Summary time series soma area data in  
365 response to high  $[K^+]_o$  in a bicarbonate free external solution. **M)** Summary data of peak  
366 increases in soma area from each experiment. **N)** Summary time series of Rhod-2/Calcein ratio  
367  $Ca^{2+}$  data in response to high  $[K^+]_o$  in the presence of acetazolamide (100  $\mu$ M) compared to  
368 control. **O)** Summary data of peak decreases in  $Ca^{2+}$  in each experiment from acetazolamide vs  
369 control. Data is mean +/- SEM, unpaired two-tailed t-tests, \*\*  $p < 0.01$ , \*\*\*\*  $p < 0.0001$   
370  
371

372

### 373 **The change in astrocyte $Ca^{2+}$ by $[K^+]_o$ does not rely on $K_{ir}$ or SLCA4A**

374 Astrocytes buffer the extracellular space from  $K^+$  increases, partly through inward rectifying  
375 potassium 4.1 channels (Chever et al., 2010). To test for the involvement of these channels in  
376 the  $K^+$ -induced  $Ca^{2+}$  decrease, we tested high  $[K^+]_o$  in the presence of  $BaCl_2$  (100  $\mu$ M), which  
377 failed to block the effect (Supplementary Figure 2A). Next, we pondered whether  $K^+$ -induced  
378 depolarization engaged the electrogenic negative sodium bicarbonate cotransporter SLCA4A  
379 (O'Connor et al., 1994) to activate soluble adenylyl cyclase (Choi et al., 2012). To explore this  
380 pathway, first we tested the +2.5mM  $K^+$  change in the presence of the SLCA4A antagonist  
381 S0589 (100 $\mu$ M) but found no attenuation in the decrease in astrocyte  $Ca^{2+}$  (Supplementary  
382 Figure 2B). Next we tested modest high  $[K^+]_o$  in the presence of the soluble adenylyl cyclase  
383 inhibitor KH7 (30 $\mu$ M), but again found no effect on the drop in  $Ca^{2+}$  measured by the Rhod-  
384 2/Calcein ratio (Supplementary Figure 2C). To more broadly probe for the involvement of  
385 transporters or exchangers that rely on  $Na^+$  influx, GLT-1, GLAST, Na/K/Cl cotransporter or the  
386  $Na^+/Ca^{2+}$  exchanger, we tested high  $[K^+]_o$  in the presence of a low  $Na^+$  external ACSF solution.  
387 By replacing NaCl with choline-chloride ( $[Na^+]_o$  decreasing from 152.25mM to 26.25mM), we still  
388 failed to find a significant reduction in the decrease in free astrocyte  $Ca^{2+}$  caused by high  $[K^+]_o$

389 (p=0.06, Supplementary Figure 2D), potentially ruling out channels and ion transport  
390 mechanisms that rely on the driving force of Na<sup>+</sup> entry.

391  
392

### 393 **Potassium and chloride cotransport is necessary for the drop in astrocyte Ca<sup>2+</sup>**

394 K<sup>+</sup> and Cl<sup>-</sup> are moved simultaneously across the plasma membrane by the sodium potassium  
395 chloride co-transporter (NKCC) and the potassium chloride cotransporter (KCC). Other K<sup>+</sup>  
396 transport mechanisms such as the Na<sup>+</sup>/K<sup>+</sup> pump influence Cl<sup>-</sup> movement via these routes (Hertz  
397 et al., 2015). Cl<sup>-</sup> ion fluxes have been implicated in astrocyte volume regulation in response to  
398 K<sup>+</sup> in the hippocampus (Larsen and MacAulay, 2017). Therefore, we set out to test whether  
399 external Cl<sup>-</sup> was involved in this phenomenon. Reducing external Cl<sup>-</sup> from 133.5mM to 7.5mM  
400 by substituting NaCl with sodium gluconate, decreased the magnitude of both the decrease in  
401 Ca<sup>2+</sup> ( $0.9 \pm 0.01$ , p=0.003, n=8, Figure 5A) and the soma swelling caused by a +2.5mM K<sup>+</sup>  
402 challenge (p=0.02, Figure 5B). We then explored the involvement of anion channels and  
403 transporters that move Cl<sup>-</sup>. Our first attempt with the broad-spectrum Cl<sup>-</sup> channel antagonist  
404 DIDS (500  $\mu$ M) was untenable due to volume dysregulation (blebbing) and Ca<sup>2+</sup> escalation in  
405 the brain slice from applying this compound alone (data not shown). However, a different broad-  
406 spectrum anion channel antagonist NPPB (100  $\mu$ M), which targets Volume Regulated Anion  
407 Channels (Inoue and Okada, 2007), Ca<sup>2+</sup>-dependent Chloride Channels (Huang et al., 2012)  
408 and Max Anion channels (Dutta et al., 2008), was tenable within the time frame of the  
409 experiment. While NPPB also caused aberrant cell volume changes across the brain slice at  
410 approximately 20min into the application (red brackets, Figure 5E,F), we were able to conduct a  
411 5min NPPB pre-incubation with a +2.5mM [K<sup>+</sup>]<sub>o</sub> challenge. Interestingly, the drop in astrocyte  
412 Ca<sup>2+</sup> still occurred in NPPB (p=0.96, Figure 5C,E,K), yet the cell swelling was blocked up to  
413 900sec ( $1.05 \pm 0.01$ , p=0.001, n=8, Figure 5D,F,L), after which time brain slice stability  
414 degraded by NPPB treatment.

415 To test Cl<sup>-</sup> transporters, we focused on proteins that moved both K<sup>+</sup> and Cl<sup>-</sup>. For  
416 example, KCC moves K<sup>+</sup> and Cl<sup>-</sup> out of the cell and KCC1 and KCC3 are detected in astrocytes  
417 (Cahoy et al., 2008; Ringel and Plesnila, 2008), whereas NKCC is not (Cahoy et al., 2008). We  
418 employed bumetanide, a common NKCC and KCC antagonist that is more potent for NKCC  
419 (Payne et al. 2003). Intriguingly, we found that a dose of bumetanide that antagonized both  
420 transporters (100  $\mu$ M) blocked the decrease in astrocyte free Ca<sup>2+</sup> in response to high [K<sup>+</sup>]<sub>o</sub>  
421 ( $0.93 \pm 0.02$ , p=0.001, n=8, Figure 5G,I,K), whereas a lower dose that putatively blocks only  
422 NKCC (2  $\mu$ M) had no effect (p=0.85, Figure 5K). Interestingly, high dose bumetanide had little

423 impact on cell swelling caused by high  $[K^+]_o$  ( $p=0.85$ , Figure 6H,J,L). We also found that  
424 bumetanide application itself caused little change to resting astrocyte  $Ca^{2+}$  ( $0.96 \pm 0.16$ ,  $n=7$ ),  
425 suggesting that the block of the drop in astrocyte  $Ca^{2+}$  by bumetanide was not due to occlusion  
426 or a floor effect. With a potential role of KCC transporters, we tested if neural-specific KCC2  
427 could be indirectly involved in this phenomenon that was observed in astrocytes. However, the  
428 selective KCC2 blocker VU-0240551 ( $10 \mu M$ ) failed to block the drop in astrocyte  $Ca^{2+}$  caused  
429 by a  $+2.5mM [K^+]_o$  challenge ( $0.82 \pm 0.03$ ,  $p=0.87$ ,  $n=4$ , Figure 5K), suggesting that neural  
430 KCC2 was not involved.

431 Collectively, the differential block of NPPB and bumetanide on swelling and  $Ca^{2+}$   
432 respectively, strongly suggest each phenomena occurs through distinct mechanisms:  $K^+$ -  
433 induced swelling depended on  $Cl^-$  ion channels and the  $K^+$ -induced  $Ca^{2+}$  change depended on  
434 potassium and chloride co-transport activity, whereas both phenomena depended on external  
435 bicarbonate and external  $Cl^-$ .

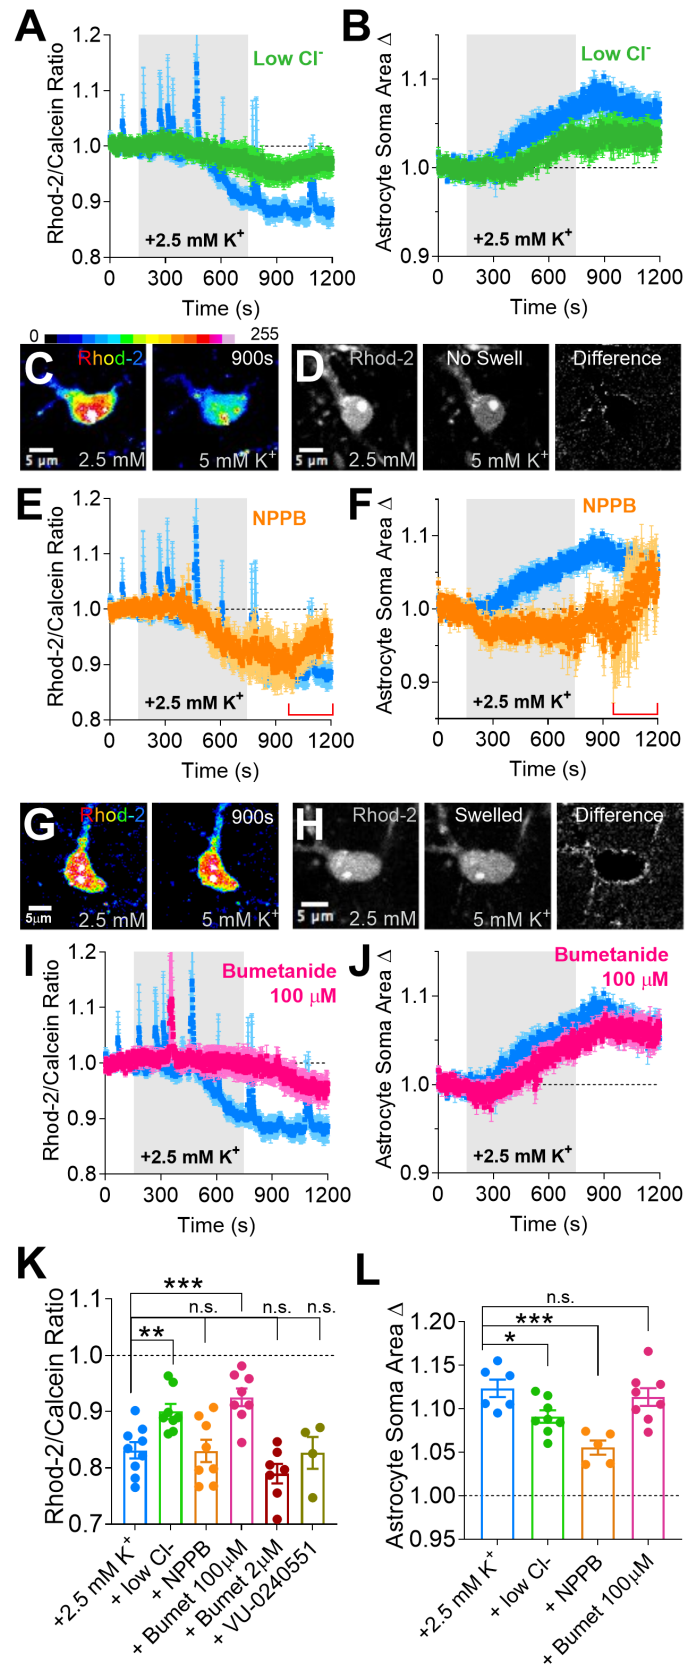



437 **Figure 5: Anion channels and K-Cl co-transport separately control cell swelling and the**  
438 **Ca<sup>2+</sup> decrease in response to moderate high [K<sup>+</sup>]<sub>o</sub>.**  
439 **A)** Summary time series of Rhod-2/Calcein ratio Ca<sup>2+</sup> data in response to high [K<sup>+</sup>]<sub>o</sub> in the  
440 presence of a low Cl<sup>-</sup> external solution (7.5 mM) compared to control. **B)** Summary time series  
441 of soma area in response to high [K<sup>+</sup>]<sub>o</sub> in a low external Cl<sup>-</sup> external solution. Both the Ca<sup>2+</sup> drop  
442 and cell swelling were reduced in low Cl<sup>-</sup> ACSF. **C)** Pseudo coloured two-photon images of an  
443 astrocyte loaded with Rhod-2, showing the decrease in free Ca<sup>2+</sup> to a +2.5mM K<sup>+</sup> challenge  
444 when anion channels were blocked with NPPB (100 μM). **D)** Two-photon images of an  
445 astrocyte showing the high K<sup>+</sup>-induced cell swelling was blocked in NPPB: no border or edge in  
446 difference image. **E and F)** Summary time series of Rhod-2/Calcein ratio Ca<sup>2+</sup> data (*E*) and  
447 astrocyte soma area (*F*) in the same NPPB experiment depicted in (*C*) and (*D*). Red brackets  
448 indicated period where there was tissue distortion occurring across the brain slice,  
449 compromising our measures. **G)** Pseudo coloured images of a Rhod-2 loaded astrocyte  
450 showing little decrease in free Ca<sup>2+</sup> to a +2.5mM K<sup>+</sup> challenge in the presence of the potassium  
451 chloride co-transporter blocker bumetanide (100 μM). **H)** Images of an astrocyte showing that  
452 the high K<sup>+</sup> induced cell swelling still occurs in bumetanide. **I and J)** Summary time series data  
453 of astrocyte Ca<sup>2+</sup> (*E*) and astrocyte soma area (*F*) in the same bumetanide experiment depicted  
454 in (*G*) and (*H*). **K)** Summary data of peak decreases in astrocyte Ca<sup>2+</sup> in each experiment. **L)**  
455 Summary data of peak increases in astrocyte soma area in each experiment. Data is mean +/-  
456 SEM, unpaired two-tailed t-tests, \* p<0.05, \*\* p<0.01, \*\*\* p<0.001  
457

458

459 **Ictal activity is accompanied with a bumetanide-sensitive reduction of astrocyte Ca<sup>2+</sup>**

460 The synchronous bursting of neuron populations is well known to elevate [K<sup>+</sup>]<sub>o</sub> (Dreier and  
461 Heinemann, 1991; Heinemann et al., 1977). We hypothesised that cortical seizure increases  
462 [K<sup>+</sup>]<sub>o</sub> to a degree that affects astrocyte free [Ca<sup>2+</sup>]<sub>i</sub> via the same mechanism as seen in our  
463 experimental elevation of [K<sup>+</sup>]<sub>o</sub> by +2.5mM. We chose the GABA<sub>A</sub> receptor inhibitor picrotoxin  
464 for seizure induction as electrical stimulation and depolarizing agents (4-aminopyridine,  
465 penicillin, Mg<sup>2+</sup> free solution) can directly trigger large Ca<sup>2+</sup> transients in astrocytes, but not  
466 GABA<sub>A</sub>-receptor antagonists (Tian et al., 2005). Picrotoxin (100μM) administration for 20 min  
467 elicited synchronous neuronal discharges, represented as spikes on the local field potential  
468 recording (Fig. 6A) and as simultaneous Ca<sup>2+</sup> transients with 2-photon imaging in layer 2-3  
469 neuron somata along with a gradual escalation of resting neuronal Ca<sup>2+</sup> levels (Fig. 6B,C).  
470 Picrotoxin did not change free astrocyte Ca<sup>2+</sup> before synchronous neuronal discharge occurred  
471 (Fig. 6A) and produced only a slight reduction in response to seizure activity (0.9645 ±  
472 0.018)(Fig. 6B,D). Ictal neuronal activity in the presence of the K<sup>+</sup> Cl<sup>-</sup> cotransporter blocker  
473 bumetanide, however, increased the integrated free Ca<sup>2+</sup> response curve (area under the curve  
474 (A.U.C): 39.55 ± 23 a.u. N=5 slices, 22 cell) compared to the control seizure condition (AUC: -  
475 8.38 ± 6.6 a.u., p=0.0332). Bumetanide is recognized for its antiepileptic properties by  
476 modulating GABAergic inhibition (Löscher et al., 2013), so we compared the size of picrotoxin-  
477 induced neuronal Ca<sup>2+</sup> response with or without bumetanide treatment. The integrated Ca<sup>2+</sup>

478 response of neurons showed no difference with bumetanide treatment (A.U.C:  $214 \pm 41$  a.u.  
479  $N=5$  slices, 22 cells) relative to the control group (A.U.C:  $263 \pm 66$  a.u.  $N=5$  slices, 22 cells,  
480  $p=0.5985$ ). This indicates that the relatively steady-state free astrocyte  $Ca^{2+}$  level is a  
481 consequence of a balance between a K-Cl cotransport-mediated decrease and, perhaps, an  
482 extracellular glutamate-induced increase of free cytosolic  $Ca^{2+}$ .  
483  
484

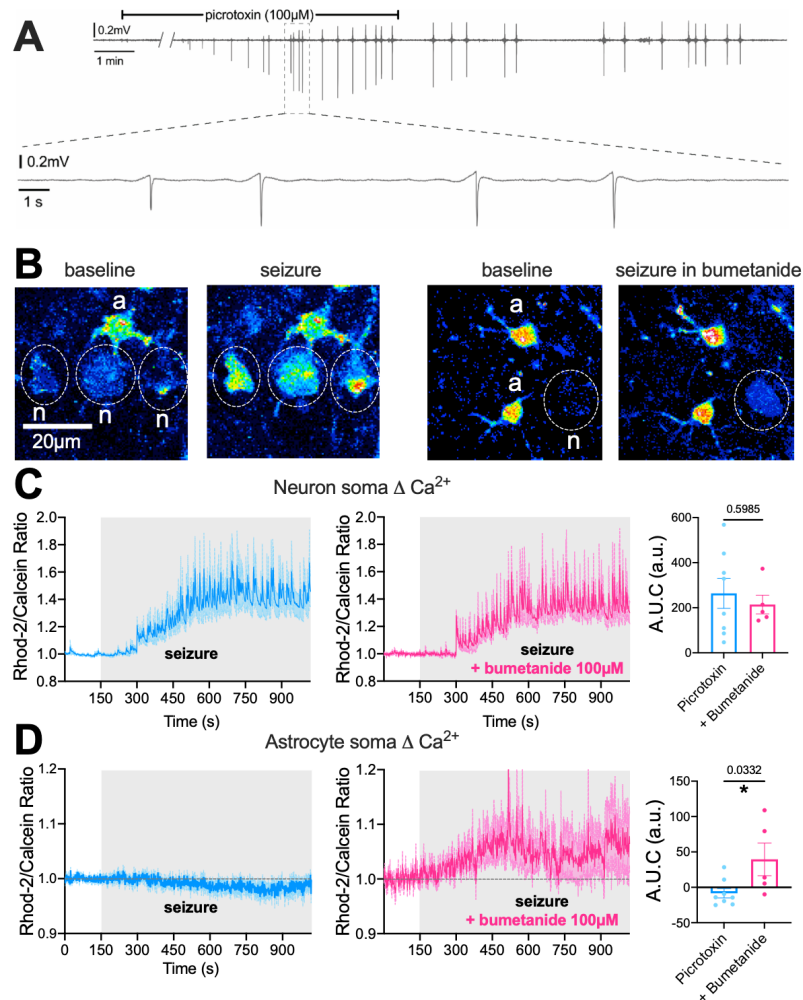

485

486 **Figure 6: Picrotoxin-induced seizure triggers a bumetanide-sensitive  $Ca^{2+}$  drop in cortical**  
487 **astrocytes.**

488 **A)** Representative local field potential trace in response to 100 $\mu$ M picrotoxin treatment for 20  
489 min shows repetitive spiking activity. **B)** Pseudo coloured two-photon images of Rhod-2-loaded  
490 astrocytes (a) and neurons (n) evoke large increases in neuronal  $Ca^{2+}$  and no change in free  
491 astrocyte  $Ca^{2+}$  to seizure (left), but astrocyte free  $Ca^{2+}$  increases in the presence of bumetanide  
492 (100  $\mu$ M). **C-D)** Summary time series of (C) neuron soma and (D) astrocyte soma Rhod-  
493 2/Calcein ratio  $Ca^{2+}$  data (average of 2-5 cells/slice) during seizure alone (blue), with  
494 bumetanide treatment (magenta) and the comparison of net area under the curve (A.U.C.) of  
495 the  $Ca^{2+}$  traces. Data is mean  $\pm$  SEM, unpaired two-tailed t-tests, \*  $p<0.05$ .

496 **High  $[K^+]_o$  dilates penetrating arterioles in part through an astrocytic mechanism**

497 Elevations in  $[K^+]_o$  dilate cerebral arterioles, though most experiments test with  $\geq 8$ mM. The  
498 opening of vascular Kir 2.1 channels is facilitated by high  $[K^+]_o$ , which leads to hyperpolarization  
499 of the membrane potential and vessel relaxation (Longden et al., 2017)(Schubert et al., 2004).  
500 High  $[K^+]_o$  in the parenchyma may access the perivascular space to initiate vasodilation either  
501 directly through limited gaps between adjacent endfeet (Mathiisen et al., 2010) or from  $K^+$  efflux  
502 from endfeet onto the vessel after astrocytes take up excess external  $K^+$  from around synapses.  
503 Elevations in astrocyte  $Ca^{2+}$  from strong synaptic activity is thought to initiate  $K^+$  efflux from  
504 endfeet occurs through BK channels (Filosa et al., 2006; Girouard et al., 2010) but not through  
505 endfoot  $K_{ir}$  channels (Metea et al., 2007). However, a role for K-Cl cotransport in  $[K^+]_o$  and  
506  $[Ca^{2+}]_i$  dependent dilation in cerebral penetrating arterioles is unclear. These cotransporters  
507 could represent an alternative route for  $K^+$  efflux from endfeet onto the vessel, or they could  
508 initiate vasodilation via changes to the free  $Ca^{2+}$  concentration in endfeet, altering the release of  
509 vasoactive substances. We found that a +2.5mM  $[K^+]_o$  increase dilated, pre-constricted (U-  
510 46619 100nM) cerebral penetrating arterioles in brain slices ( $1.07 \pm 0.01$ ,  $p < 0.001$ ,  $n = 13$ , Figure  
511 7A,B,C), which returned to baseline after high  $[K^+]_o$  washout. Notably, bumetanide (100 $\mu$ M)  
512 completely blocked the high  $[K^+]_o$  induced dilation, resulting in a small vasoconstriction ( $0.92 \pm$   
513  $0.013$ ,  $p = 0.003$ ,  $n = 8$ , Figure 7B,C), consistent with an important role for K-Cl cotransport.  
514 Testing other classic vasoactive pathways, as expected we found that vasodilation to moderate  
515  $[K^+]_o$  elevation was blocked by the  $K_{ir}$  blocker  $Ba^{2+}$  (100 $\mu$ M) (Figure 7D). The NOS blocker L-  
516 NAME (100 $\mu$ M) also prevented the dilation to +2.5mM  $K^+$  (Figure 7D). However, the COX-1  
517 blocker SC560 (1 $\mu$ M) and the COX-2 blocker SC-58125 (1 $\mu$ M) combined had an opposite  
518 effect, potentiating the dilation response to elevated  $[K^+]_o$  (Figure 7D), which was likely due to  
519 increased arteriole tone from the COX-1 antagonist (Haidey et al., 2021; Rosenegger et al.,  
520 2015), increasing the dilatatory range.

521 The block of vasodilation by bumetanide may not necessarily localize to astrocytes, as  
522 studies on arterioles outside the brain have described a role for K-Cl cotransport in contractile  
523 function (Garneau et al., 2016; Löscher et al., 2013). To test the idea that the influence of high  
524  $[K^+]_o$  on the arteriole was conducted, at least in part, through astrocytes, we tested the  
525 hypothesis that disrupting normal ion homeostasis in the network of astrocytes surrounding a  
526 penetrating arteriole compromises  $K^+$ -induced vasodilation. A common intracellular whole-cell  
527 patch solution involving EGTA, low  $[Cl^-]_i$  and a HEPES pH buffer, perturbs the natural level  
528 and/or movements of  $Ca^{2+}$  (Zheng et al., 2015),  $Cl^-$  (Kyrozis and Reichling, 1995) and  $HCO_3^-$   
529 (Staley and Proctor, 1999). We patched peri-arteriole astrocytes and loaded them with a

530 standard intracellular solution plus Alexa 488 sodium hydrazide (200 $\mu$ M) to visualize the extent  
 531 of astrocyte network loading and to ensure the solution infiltrated endfeet apposed to the vessel  
 532 wall. Previously we reported that this intracellular solution had little impact on resting arteriole  
 533 diameter (Rosenegger et al., 2015). After allowing at least 10min for the astrocyte patch solution  
 534 to diffuse and equilibrate, we bath applied a +2.5mM [K<sup>+</sup>]<sub>o</sub> challenge and found that high K<sup>+</sup>-  
 535 induced dilation was converted into a vasoconstriction (0.93  $\pm$  0.02, n=4, Figure 7D-G). To  
 536 control for the possibility that the patching process itself caused the switch from vasodilation to  
 537 vasoconstriction, as opposed to a disruption of the intracellular milieu of astrocytes, we  
 538 conducted mock patching experiments. Here, rather than achieving astrocyte whole-cell, an on-  
 539 cell configuration was maintained. Under these conditions, the K<sup>+</sup>-induced vasodilation still  
 540 occurred (1.04  $\pm$  0.02, n=9, Figure 7F,G), which was different from experiments with whole-cell  
 541 patch (p=0.007). These data show that antagonizing K-Cl cotransport activity or a general  
 542 disruption of the internal astrocytic environment, blocks vasodilation to a modest increase in  
 543 external K<sup>+</sup>.

544  
 545  
 546  
 547  
 548  
 549  
 550  
 551  
 552

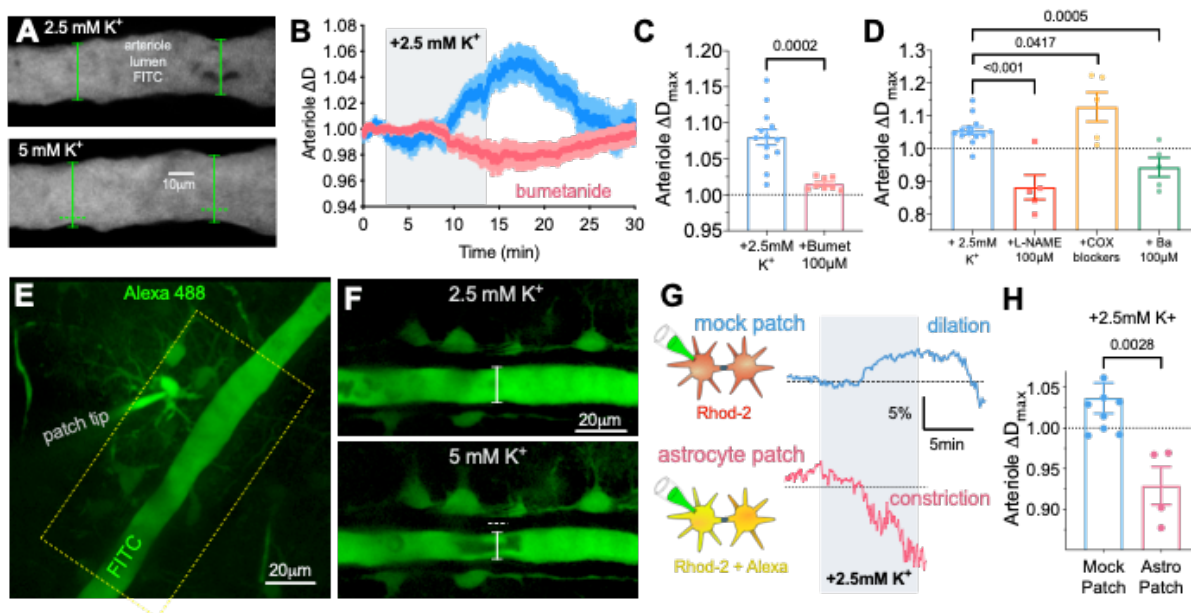

553 **Figure 7: K<sup>+</sup>-mediated vasodilation requires K-Cl co-transport, NO, Kir, and is blocked by**  
554 **astrocyte patching**

555 **A)** Images of the arteriole lumen filled with FITC-dextran showing a vasodilation in response to  
556 a +2.5mM increase in external K<sup>+</sup> in acute slices. **B)** Summary time series data of arteriole  
557 diameter in response to +2.5mM K<sup>+</sup> in the control condition (blue), and in the presence of  
558 bumetanide (pink). Bumetanide blocks the high K<sup>+</sup> mediated vasodilation which instead  
559 manifests as a small vasoconstriction. **C)** Summary data of peak arteriole diameter changes  
560 related to **B)**. **D)** Arteriole diameter changes at the peak of the summary curve during +2.5mM  
561 K<sup>+</sup> in the presence of L-NAME, COX-1 (SC560) and COX-2 (SC58125) blockers and Barium.  
562 **E)** Two-photon z-stack image showing a patched astrocyte, the coupled astrocytes and  
563 perivascular endfeet (Alexa 488) opposed to a penetrating arteriole (FITC-dextran in lumen). **F)**  
564 Close up of the arteriole and opposed endfeet loaded with Alexa 488 via the patched astrocyte  
565 (not shown, above image plane). A +2.5mM K<sup>+</sup> increase caused a vasoconstriction when the  
566 astrocyte was patched. **G)** Upper: trace of the vasodilation observed in response to high K<sup>+</sup> in  
567 the presence of a 'mock astrocyte patch' experiment (pipette sealed/abutted to the cell  
568 membrane but no whole-cell). Lower: trace of the vasoconstriction observed in response to  
569 high K<sup>+</sup> in the presence astrocyte network filling with a standard, HEPES buffered internal  
570 solution. **H)** Summary data of peak arteriole diameter changes. Data is mean +/- SEM,  
571 unpaired two-tailed t-tests, \*\* p<0.01, \*\*\* p<0.001  
572

573

574

575 **Discussion**

576 Here we show that a modest increase or decrease in external [K<sup>+</sup>] bi-directionally and  
577 reciprocally controls the resting free Ca<sup>2+</sup> concentration and cell volume in astrocytes. Resting  
578 Ca<sup>2+</sup> is a recent consideration, given observations that astrocytes appear to have a higher  
579 resting Ca<sup>2+</sup> concentration than neurons *in vitro* and *in vivo* (Shigetomi et al., 2012; 2013b;  
580 Zheng et al., 2015) and at least two populations of astrocytes can be designated by different  
581 resting Ca<sup>2+</sup> levels (Zheng et al., 2015). Furthermore, astrocyte resting Ca<sup>2+</sup> is thought to  
582 contribute to 1) constitutive D-serine release (Shigetomi et al., 2013b), 2) basal arteriole tone  
583 regulation (Rosenegger et al., 2015; Mehina et al., 2017) and 3) basal release probability at  
584 excitatory synapses (Panatier et al., 2011). Evidence shows that the steady-state Ca<sup>2+</sup>  
585 concentration in the cytosol is at least partly dependent on Ca<sup>2+</sup> influx from outside the cell. This  
586 could occur via spontaneous microdomain Ca<sup>2+</sup> transients, or via constant influx, each through  
587 specific ion channels. Some propose a Ca<sup>2+</sup> influx pathway through TRPA1 channels, regulating  
588 both microdomain transients and the baseline Ca<sup>2+</sup> level (Shigetomi et al., 2012; Shigetomi et  
589 al., 2013b). However, others have shown that TRPA1 is not responsible for the microdomain  
590 Ca<sup>2+</sup> transients (Rungta et al., 2016). Though the resting Ca<sup>2+</sup> level was not directly examined in  
591 this latter study, bath applying a Ca<sup>2+</sup> free external solution plus EGTA decreased the baseline  
592 Ca<sup>2+</sup> level in flou-4 patch loaded astrocytes (Rungta et al., 2016). Our data is consistent with the

593 idea that a modest elevation in  $[K^+]_o$  decreased ongoing  $Ca^{2+}$  influx across the plasma  
594 membrane, but not via decreased release from internal  $Ca^{2+}$  stores. We expect that the  
595 decrease in cytosolic free  $Ca^{2+}$  occurred in  $Ca^{2+}$  free solution, as shown by others previously,  
596 which could not be decreased further when  $[K^+]_o$  became elevated. It remains unclear how free  
597 cytosolic  $Ca^{2+}$  decreases due to decreased influx. The bidirectional nature of the  $Ca^{2+}$  change,  
598 and the well-documented influence of external  $K^+$  on controlling astrocyte resting membrane  
599 potential, leads us to speculate that a change in membrane voltage is an aspect to the  
600 phenomenon. Small increases in external  $K^+$  of 1mM will shift  $E_K \sim 9mV$ , which, after a  
601 subsequent depolarizing shift in membrane potential, would lessen the driving force for the  
602 inward movement of  $Ca^{2+}$ . From this, one might expect that we could block the drop in  $Ca^{2+}$  by  
603 clamping membrane potential at a hyperpolarized value, such as in our FLIM experiments.  
604 However, astrocytes are poorly voltage clamped given their high resting permeability to  $K^+$  and  
605 very low input resistance (Steinhauser et al., 1992; Ma et al., 2014).

606         What type of K-Cl co-transport is involved in the  $K^+$ -mediated changes to astrocyte free  
607  $Ca^{2+}$ ? Astrocyte transcriptome evidence from the neocortex shows no detectable expression of  
608 NKCCs in astrocytes, whereas KCC1 and KCC3 are clearly transcribed (Cahoy et al., 2008;  
609 Zhang et al., 2014). Importantly, though bumetanide is typically a NKCC blocker, it does block  
610 KCC1 at higher doses (Gillen and Forbush, 1999). We found no block of the effect with 2  $\mu M$   
611 bumetanide, which should only block NKCCs, whereas 100  $\mu M$  was highly effective. That low  
612  $Na^+$  external solution did not block the drop in  $Ca^{2+}$  to high  $K^+$  also argues against the  
613 involvement of NKCCs. These observations lead us to support a role for KCCs over NKCCs in  
614 our described effects. However, two limitations are: 1) we were only able to decrease  $[Na^+]_o$  to  
615 26.25 mM and the difference in the  $Ca^{2+}$  drop to control was nearly significant ( $p=0.06$ ). A  
616 further decrease in external  $Na^+$  may have revealed a significant reduction in the  $Ca^{2+}$  drop. 2)  
617 As 2  $\mu M$  bumetanide is  $\sim$ twice the  $IC_{50}$  for NKCC, a higher dose may be necessary in acute  
618 slices to achieve a block. Furthermore, 100 $\mu M$  is expected to block KCCs, yet, this would be on  
619 the lower end of the dose response curve. Thus, further experiments knocking down KCCs vs  
620 NKCCs in astrocytes is warranted.

621         Though  $K_{ir} 4.1$  on astrocytes contributes to  $K^+$  buffering, and the  $K^+$  influx could increase  
622 KCC activity, we found no effect of 100 $\mu M$   $Ba^{2+}$  on the  $K^+$ -induced decrease in astrocyte  $Ca^{2+}$ .  
623 Previous work observed that decreasing external  $K^+$  can increase  $Ca^{2+}$  via a  $BaCl_2$  sensitive  
624 pathway in cultured astrocytes and *in situ* (Dallwig et al., 2000). While this is analogous to the  
625 effects we observed with a 1mM decrease in  $[K^+]_o$ , this work employed a larger unphysiological  
626 drop than we explored: moving from 5mM to 0.2 or 0.4 mM  $[K^+]_o$ . If not inward rectifiers, what

627 invokes K-Cl co-transport? High  $[K^+]_o$  will increase  $Na^+/K^+$  ATPase activity, increasing  
628 intracellular  $[K^+]$ , which could subsequently increase the efflux of  $K^+$  and  $Cl^-$  via the co-  
629 transporters. However, blocking this crucial ATPase to test its role in our effect is untenable in  
630 brain slices at the micron-level due to robust cell volume changes to the antagonist ouabain  
631 (Joshi and Andrew, 2001). Alternatively, high external  $K^+$  would also limit KCC co-transport  
632 activity by acting against the outward movement of  $K^+$  and  $Cl^-$  ions. The cumulative effect on  $K^+$   
633 and  $Cl^-$  transport activity would depend on the relative expression, the kinetics of each transport  
634 system, as well as their respective locations in the cell. For example, if KCCs were targeted to  
635 the vascular interface of endfeet and thus sheltered directly from parenchymal elevations in  $K^+$ .  
636 Undoubtedly, changing K-Cl cotransport activity will affect the intracellular  $K^+$  and  $Cl^-$   
637 concentrations, and potentially membrane potential due to effects on other transport  
638 mechanisms or ion channels. For instance, bumetanide itself influences membrane potential in  
639 kidney cells (Wang et al., 2013) and skeletal muscle (van Mil et al., 1997) and bumetanide can  
640 prevent membrane potential changes to osmotic stimuli (van Mil et al., 1997).

641 We demonstrated that during cortical seizure,  $K^+$  buffering by astrocytes drives a K-Cl  
642 cotransport-mediated reduction of free  $Ca^{2+}$ . This reduction, however, is counteracted by other  
643 factors (likely glutamate) rising free  $Ca^{2+}$  level to produce an overall steady  $Ca^{2+}$  concentration  
644 in astrocytes. The elevation of astrocyte free  $Ca^{2+}$  during seizures was shown to promote and  
645 maintain ictal activity (Gómez-Gonzalo et al., 2010). The K-Cl-cotransport mediated reduction of  
646 astrocytic  $Ca^{2+}$  likely exerts an anti-ictal effect when seizure elevates  $[K^+]_o$ . This phenomenon  
647 needs further exploration to confirm the anti-epileptic property of  $K^+$ -induced astrocyte  $Ca^{2+}$  drop  
648 in other seizure models and *in vivo*.

649 It is important to consider whether the decrease in astrocyte  $Ca^{2+}$  caused by a moderate  
650 elevation in  $[K^+]_o$  was itself sufficient to cause high  $K^+$ -induced vasodilation. From one  
651 perspective, our data argue against the sufficiency of astrocyte  $Ca^{2+}$  because although patching  
652 a peri-arteriole astrocyte blocks  $K^+$ -induced vasodilation,  $Ca^{2+}$  is likely still decreasing in  
653 astrocytes. This was clearly the case given our FLIM  $Ca^{2+}$  measures, which introduced OGB-1  
654 into astrocytes via the patch pipette. In this condition, the  $Ca^{2+}$  drop could be detected in all  
655 compartments of the patched cell, including peri-vascular endfeet. Thus, the patch could have  
656 disrupted a different ion such as  $Cl^-$  or  $HCO_3^-$  to change the response of the vessel. From  
657 another perspective, the resting  $Ca^{2+}$  level is significantly higher in the patched cell compared to  
658 coupled cells. Thus, even though  $Ca^{2+}$  still decreased while patched in response to high  $[K^+]_o$ ,  
659 the absolute level of  $Ca^{2+}$  reached was not as low as un-patched astrocytes (~75nM compared  
660 to ~40nM). This could affect the type or amount of vaso-active messenger being released from

661 astrocytes, which could explain why we observed a vasoconstriction to high  $K^+$  instead of a  
662 vasodilation while the peri-vascular astrocyte was patched. It is important to note that we  
663 previously observed a vasoconstriction when astrocyte  $Ca^{2+}$  was lowered to  $<25nM$  via a  
664 BAPTA loaded patch pipette (Rosenegger et al., 2015; Haidey et al., 2021) and long lasting  
665 increases in arteriole tone (vasoconstriction) to glutamate receptor activation that were  
666 associated with a decrease in endfoot  $Ca^{2+}$ . These are opposite to what we observed with  
667 moderate high  $[K^+]_o$ , in which a free  $Ca^{2+}$  decrease was associated with a vasodilation. Key  
668 differences could be 1) the absolute level of  $Ca^{2+}$  achieved with each manipulation and 2) the  
669 microdomains where the effects were occurring. For example, BAPTA affects the entire cytosol  
670 indiscriminately, whereas  $K^+$  and glutamate will have microdomain effects for where  
671 transporters, receptors and vasoactive enzymes are located. Measuring such changes in free  
672  $Ca^{2+}$  with a freely diffusible, cell-wide  $Ca^{2+}$  indicator cannot distinguish between different  
673 mechanisms occurring in unique microdomains.

674

675

676

677

678

679

680

681

682

683

684

685

686

687

688

689



## 690 **METHODS**

### 691 **EXPERIMENTAL MODEL AND SUBJECT DETAILS**

692 All animal procedures were approved by the Animal Care and Use Committee of the University  
693 of Calgary (protocols AC15-0053 and AC15-0133). All studies were performed on either male  
694 Sprague Dawley rats between P23 to P30, or male C57BL/6 mice between P30 to P60 (Charles  
695 River, Wilmington, MA, USA). Animals were kept on a standard 12 hour dark 12 hour light cycle  
696 and had *ad libitum* access to food and water. Animals were group housed until head-bar  
697 installation for in vivo experiments. The experimenter was not blinded to any treatment.

698

### 699 **METHOD DETAILS**

#### 700 **Acute Brain Slice Preparation**

701 Care and use of animals for this project was carried out in accordance with approved guidelines  
702 set forth by the University of Calgary Animal Care and Use Committee. Male Sprague Dawley  
703 rats (P23-P30) were deeply anaesthetized with gaseous isoflurane (5%) and then decapitated  
704 using a rodent guillotine. The brain was rapidly and surgically removed, then submerged for ~2  
705 minutes in ice-cold slicing solution containing (in mM): 119.9 N-methyl-D-glucamine, 2.5 KCl, 25  
706 NaHCO<sub>3</sub>, 1.0 CaCl<sub>2</sub>·2H<sub>2</sub>O, 6.9 MgCl<sub>2</sub>·6H<sub>2</sub>O, 1.4 NaH<sub>2</sub>PO<sub>4</sub>·H<sub>2</sub>O, and 20 D-glucose. The brain  
707 was then Krazy Glued onto a vibratome tray (Leica Instruments, VT1200S) and then re-  
708 submerged in ice-cold slicing solution. Acute coronal slices were prepared from the  
709 somatosensory cortex (400 µm thick). The slices were incubated for 45 minutes at 33°C in a  
710 recovery chamber filled with artificial cerebrospinal fluid (ACSF) containing (in mM): 126 NaCl,  
711 2.5 KCl, 25 NaHCO<sub>3</sub>, 1.3 CaCl<sub>2</sub>·2H<sub>2</sub>O, 1.2 MgCl<sub>2</sub>·6H<sub>2</sub>O, 1.25 NaH<sub>2</sub>PO<sub>4</sub>·H<sub>2</sub>O, 10 glucose. At  
712 all steps of tissue preparation and for all experiments using bicarbonate buffered ACSF, the  
713 brain/slices were continuously bubbled with carbogen (95% oxygen, 5% carbon dioxide).

714

#### 715 **Contents of Various ACSF Solutions**

716 High K<sup>+</sup> ACSF was bath applied in order to raise external [K<sup>+</sup>] to 5.0 mM. In order to keep high  
717 K<sup>+</sup> ACSF solutions iso-osmotic with regular ACSF, the solutions were prepared by adding  
718 additional KCl to achieve 5.0 mM while an equimolar amount of NaCl was removed. This  
719 solution contained (in mM): 123 NaCl, 5 KCl, 25 NaHCO<sub>3</sub>, 1.3 CaCl<sub>2</sub>·2H<sub>2</sub>O, 1.2 MgCl<sub>2</sub>·6H<sub>2</sub>O,  
720 1.25 NaH<sub>2</sub>PO<sub>4</sub>·H<sub>2</sub>O, 10 glucose. For all experiments using bicarbonate buffered ACSF, the  
721 brain slices were continuously bubbled with carbogen (95% oxygen, 5% carbon dioxide).

722 In bicarbonate-free experiments, slices will be transferred into 4-(2-hydroxyethyl)-1-  
723 piperazineethanesulfonic acid (HEPES) buffered ACSF after the 45 minute incubation  
724 (mentioned above) in bicarbonate buffered ACSF. The HEPES buffered ACSF contains (in  
725 mM): 142 NaCl, 2.5 KCl, 10 HEPES, 1.3 CaCl<sub>2</sub>·2H<sub>2</sub>O, 1.2 MgCl<sub>2</sub>·6H<sub>2</sub>O, 1.25 NaH<sub>2</sub>PO<sub>4</sub>·H<sub>2</sub>O,  
726 10 glucose. The HEPES buffered ACSF used to increase extracellular [K<sup>+</sup>] to 5.0 mM contains  
727 (in mM): 139 NaCl, 5 KCl, 10 HEPES, 1.3 CaCl<sub>2</sub>·2H<sub>2</sub>O, 1.2 MgCl<sub>2</sub>·6H<sub>2</sub>O, 1.25 NaH<sub>2</sub>PO<sub>4</sub>·H<sub>2</sub>O,  
728 10 glucose. For all experiments using HEPES buffered ACSF, the brain slices were  
729 continuously bubbled with 100% oxygen and pH corrected with NaOH to 7.4.

730 For experiments substituting Na<sup>+</sup>, NaCl was replaced with choline chloride  
731 (C<sub>5</sub>H<sub>14</sub>CINO) in order to maintain Cl<sup>-</sup> levels and osmolarity. This solution contained (in mM):  
732 126 C<sub>5</sub>H<sub>14</sub>CINO, 2.5 KCl, 25 NaHCO<sub>3</sub>, 1.3 CaCl<sub>2</sub>·2H<sub>2</sub>O, 1.2 MgCl<sub>2</sub>·6H<sub>2</sub>O, 1.25 NaH<sub>2</sub>PO<sub>4</sub>·  
733 H<sub>2</sub>O, 10 glucose. The ACSF used to increase extracellular [K<sup>+</sup>] to 5.0 mM with this substitution  
734 contained (in mM): 123 C<sub>5</sub>H<sub>14</sub>CINO, 5 KCl, 25 NaHCO<sub>3</sub>, 1.3 CaCl<sub>2</sub>·2H<sub>2</sub>O, 1.2 MgCl<sub>2</sub>·6H<sub>2</sub>O,  
735 1.25 NaH<sub>2</sub>PO<sub>4</sub>·H<sub>2</sub>O, 10 glucose. Brain slices were continuously bubbled with carbogen (95%  
736 oxygen, 5% carbon dioxide).

737 For experiments substituting Cl<sup>-</sup>, NaCl was replaced with sodium gluconate  
738 (C<sub>6</sub>H<sub>11</sub>NaO<sub>7</sub>) in order to maintain Na<sup>+</sup> levels and osmolarity. This solution contained (in mM):  
739 126 C<sub>6</sub>H<sub>11</sub>NaO<sub>7</sub>, 2.5 KCl, 25 NaHCO<sub>3</sub>, 1.3 CaCl<sub>2</sub>·2H<sub>2</sub>O, 1.2 MgCl<sub>2</sub>·6H<sub>2</sub>O, 1.25 NaH<sub>2</sub>PO<sub>4</sub>·  
740 H<sub>2</sub>O, 10 glucose. The ACSF used to increase extracellular [K<sup>+</sup>] to 5.0 mM with this substitution  
741 contained (in mM): 123 C<sub>6</sub>H<sub>11</sub>NaO<sub>7</sub>, 5 KCl, 25 NaHCO<sub>3</sub>, 1.3 CaCl<sub>2</sub>·2H<sub>2</sub>O, 1.2 MgCl<sub>2</sub>·6H<sub>2</sub>O,  
742 1.25 NaH<sub>2</sub>PO<sub>4</sub>·H<sub>2</sub>O, 10 glucose. Brain slices were continuously bubbled with carbogen (95%  
743 oxygen, 5% carbon dioxide).

744 In experiments removing external Ca<sup>2+</sup>, Ca<sup>2+</sup> free ACSF external solutions were made.  
745 This solution contained (in mM): 126 NaCl, 2.5 KCl, 25 NaHCO<sub>3</sub>, 1.2 MgCl<sub>2</sub>·6H<sub>2</sub>O, 1.25  
746 NaH<sub>2</sub>PO<sub>4</sub>·H<sub>2</sub>O, 10 glucose. The Ca<sup>2+</sup>-free solution used to increase extracellular [K<sup>+</sup>] to 5.0  
747 mM contained (in mM): 123 NaCl, 5 KCl, 25 NaHCO<sub>3</sub>, 1.2 MgCl<sub>2</sub>·6H<sub>2</sub>O, 1.25 NaH<sub>2</sub>PO<sub>4</sub>·H<sub>2</sub>O,  
748 10 glucose. Brain slices were continuously bubbled with carbogen (95% oxygen, 5% carbon  
749 dioxide).

750

### 751 **Loading Dyes in Astrocytes, Neurons, and Arterioles**

752 After recovery from slicing, the tissue was incubated in a 3 mL well at 33°C for 45 minutes with  
753 the calcium indicator Rhodamine-2 acetoxymethyl ester (Rhod-2 AM) (15 μM) and the  
754 morphological dye Calcein Green AM (17 μM) (Biotium, Fremont, CA, USA); 0.2% DMSO;  
755 0.006% Pluronic Acid; 0.0002% Cremophore EL. During incubation in the small well, slices

756 received very fine carbogen bubbling using a flexible 34 gauge pipette tip (WPI, Sarasota, FL,  
757 USA). This dual labelling allowed us to take a ratio of the changes in the fluorescence of the  
758 calcium indicator over that of the changes in the morphological dye. Astrocytes were identified  
759 by their bright uptake of Rhod-2 AM and by their perivascular endfeet (Simard et al., 2003;  
760 Mulligan and MacVicar, 2004).

761 For experiments that examined parenchymal arterioles, the animal received a tail vein  
762 injection of 15 mg Fluorescein Isothiocyanate (FITC) dextran (2000 kDa, Sigma Aldrich)  
763 dissolved in 300  $\mu$ L of lactated Ringer's solution under isoflurane anesthesia (5% induction, 2%  
764 maintenance) before decapitation. Luminal FITC-dextran permitted visualization of the brain  
765 microvasculature and we quantified arteriole diameter as a change in lumen area. For an  
766 experiment, a given slice was transferred to a superfusion chamber on the rig and was perfused  
767 using a pressure driven (carbogen) solution delivery system at  $\sim$ 1.0 mL per minute, maintained  
768 at room temperature. For experiments examining arterioles, the thromboxane A2 analog  
769 U46619 (100 nM) was present continually in the bath to provide constant artificial tone, as was  
770 done previously (Institoris et al., 2015).

771

## 772 **Two-Photon Fluorescence Microscopy**

773 Slices were imaged using a custom built two-photon microscope (Rosenegger et al., 2014) fed  
774 by a Ti:Sapph laser source (Coherent Ultra II,  $\sim$ 4 W average output at 800 nm,  $\sim$ 80 MHz).  
775 Image data were acquired using MatLab (2013) running an open source scanning microscope  
776 control software called ScanImage (version 3.81, HHMI/Janelia Farms) (Pologruto et al., 2003).  
777 Imaging was performed at an excitation wavelength of 850 nm for Rhod-2/Calcein experiments.  
778 The microscope was equipped with a primary dichroic mirror at 695 nm and green and red  
779 fluorescence was split and filtered using a secondary dichroic at 560 nm and two bandpass  
780 emission filters: 525-40 nm and 605-70 nm (Chroma Technologies). Time series images were  
781 acquired at 0.98 Hz with a pixel density of 512 by 512 and a field of view size of  $\sim$ 150  $\mu$ m.  
782 Imaging used an Olympus 40x water dipping objective lens (NA 0.8, WD 3.0 mm).

783

## 784 **Fluorescence Lifetime Imaging Microscopy (FLIM)**

785 Time resolved fluorescent lifetime imaging: Acute slices from Sprague Dawley rats (P21-28)  
786 were incubated in 1  $\mu$ M SR101 to load astrocytes for identification for whole-cell patch clamp.  
787 The pipette recording solution consisted of (in mM): 113 K-Gluconate, 3 KCl, 8 Na-Gluconate, 2  
788 MgCl<sub>2</sub>, 4 K<sub>2</sub>ATP, 0.3 NaGTP, 10 HEPES, 1 EGTA, 0.23 CaCl<sub>2</sub>, 0.2 OGB-1 Hexapotassium salt  
789 (Thermo Fischer), pH and osmolarity adjusted to 7.25 (with KOH) and 290 mOsm, respectively.

790 SR101 positive cells were whole-cell patch clamped and were dialyzed for at least 20 min prior  
791 to imaging to permit sufficient OGB-1 dye dialysis to gap-junctionally coupled neighbours. FLIM  
792 images were acquired with a Zeiss LSM 7 imaging system retrofitted with FLIM hardware  
793 module (SPC-150) from Becker Hickl. OGB-1 was imaged at 800nm using a tunable pulsed 2-  
794 photon Ti:Sa femtosecond laser (Coherent) with a 80MHz repetition rate and a 20X water  
795 immersion objective (NA=1). Individual images were acquired at 256x256 (x,y) pixels, 32 frame  
796 scans per image, with images acquired in 30s intervals to avoid phototoxicity. Lifetime decay  
797 data from individual pixels were binned with neighbouring pixels by a factor of 2 to ensure at  
798 least 10 photon counts were present at the end of each trial and ensuring proper exponential  
799 fitting. The lifetime data were fit based on a 2-component multiexponential decay calculation  
800 using Becker & Hickl's SPCImage (version 6.5) software based on goodness of fit. Raw data  
801 are presented as 'Tau mean' ( $\tau_{\text{mean}}$ ), encompassing the weighted contributions of each  
802 component of the full decay curve and is expressed as:  $\tau_{\text{mean}} = \alpha_1\tau_1 + \alpha_2\tau_2$ , where  $\alpha_1$  and  $\alpha_2$   
803 represent the fractional relative intensities (i.e.  $\alpha_1 + \alpha_2 = 1$ ) of the respective tau components  $\tau_1$   
804 and  $\tau_2$ . Mean lifetime was used over 'intensity-weighted average lifetime' (i.e. decay  
805 components weighted by intensity integrals) as  $\tau_{\text{mean}}$  calculations are more sensitive to  
806 changes at fast lifetimes and therefore low  $\text{Ca}^{2+}$  concentrations (Becker, 2012). Calculated  
807  $\tau_{\text{mean}}$  data were compared to their respective  $\text{Ca}^{2+}$  concentrations via in vitro calibration  
808 (below).

809

### 810 ***In vitro* OGB-1 Lifetime Calibration**

811 OGB-1 calibration was performed in sealed recording electrodes at 33°C similar to that  
812 described previously (Zheng et al., 2015). Electrodes were filled with an electrophysiological  
813 recording solution consistent of (in mM): 93 K-Gluconate, 8 Na-Gluconate, 2  $\text{MgCl}_2$ , 4  $\text{K}_2\text{ATP}$ ,  
814 0.3  $\text{NaGTP}$ , 10 HEPES, 10 EGTA, 0.2 OGB-1 hexapotassium salt. 1.17-20,000nM of free  $\text{Ca}^{2+}$   
815 (added as  $\text{CaCl}_2$ ) was calculated using Webmaxc Standard  
816 (<http://web.stanford.edu/~cpatton/webmaxcS.htm>) and balanced accordingly with KCl and pH  
817 adjusted to pH=7.25 with KOH. Note that OGB-1 lifetimes are not affected by changes in pH,  
818 temperature, or viscosity (Zheng et al., 2015). Calibration data were fit to a four-variable logistic  
819 (sigmoid) function:  $Y = -4.87 \cdot 10^6 + (3300 + 4.87 \cdot 10^6) / (1 + 10^{((2.075 - X) \cdot 1.573)})$ , where Y =  
820 Tau(mean) and X= calcium concentration.

821

### 822 **Enriched Environment**

823 For the enriched animal experiments, 7 Sprague Dawley rats (P21 to P42-45) lived communally  
824 in an enriched environment, which was approximately 2 feet x 1.5 feet x 1.5 feet in size for 3  
825 weeks. Within this environment were: a running wheel, tunnels, ladders, hammocks, shelters,  
826 and readily accessible food and water.

827

### 828 **Astrocyte Patch-Clamp**

829 To be selected for patch-clamp, astrocytes were required to be located between ~25 to 40  $\mu\text{m}$   
830 below the surface of the slice and within ~30 to 50  $\mu\text{m}$  from the arteriole of interest. A Giga-Ohm  
831 seal was maintained for 5 minutes, followed by a whole-cell configuration with 15 minutes of  
832 astrocyte filling for adequate diffusion of the internal solution into the astrocyte network.  
833 AlexaFluor-488 sodium hydrazide (100-200  $\mu\text{M}$ ) was included in the intracellular solution in  
834 order to visualize the extent of solution diffusion throughout the astrocyte network. The  
835 intracellular solution also contained (in mM): 108 potassium gluconate, 8 KCl, 8 sodium  
836 gluconate, 2  $\text{MgCl}_2$ , 10 HEPES, 0.1 potassium EGTA, 4 ATP, and 0.3 sodium GTP. Moreover,  
837 the solution was corrected for osmolarity to ~285 mosmol and corrected for pH with KOH to 7.2.  
838 The astrocyte cell type was confirmed by the following: a low input resistance (10-20 M $\Omega$ ),  
839 extensive dye transfer between coupled cells via gap junctions, and visibly loaded endfeet  
840 apposed to microvasculature.

841

### 842 **Local field potential measurement**

843 A 3-5 Mega-Ohm pipette, filled with ACSF, was lowered ~50 $\mu\text{m}$  deep in layer 2-3 of the  
844 neocortical slice. Local field potential was detected with a Multiclamp 700B amplifier (Molecular  
845 Devices), digitized by and Axon Instruments digitizer (1550) and acquired with Clampex version  
846 10 software (Molecular Devices) in gap-free mode, sampled at 10kHz and lowpass filtered at  
847 1kHz using a Bessel filter. Post hoc a high pass 1-50Hz frequency filter was applied to the trace  
848 data to identify bursting activity.

849

### 850 ***In vivo* surgery and two-photon imaging**

851 Male, P40-60 c57bl/6 mice (N=3) were used. First, under isoflurane anesthesia (induction 4%,  
852 maintenance 1.5-2%) and pain control (buprenorphin 0.05mg/kg) a light (0.5 g) metal headbar  
853 was installed on the occipital bone under aseptic conditions with a three component dental glue  
854 (C&B Metabond, Parkell Inc, NY, USA) and dental cement (OrthoJet Acrylic Resin, Land Dental  
855 MFG. CO., Inc., IL, USA). A cement wall was mounted around the right parietal bone forming a  
856 well around the somatosensory area. A blunt piece of an 18G needle was implanted in the medial

857 side of the well to allow for the superfusion of artificial cerebrospinal fluid (aCSF). When the  
858 cement was cured, a 2mm in diameter hole was drilled with a center 3mm lateral and 2mm  
859 posterior to the Bregma. A custom-made circular glass coverslip was superglued over the  
860 craniotomy. This 3mm-wide coverslip contained 2x 600 $\mu$ m-wide circular holes located off center.  
861 Next, the dura under the holes was gently removed under continuous superfusion of a HEPES-  
862 based aCSF (in mM: 5 KCl, 142 NaCl, 10 glucose, 10 HEPES, 3.1 CaCl<sub>2</sub>, 1.3 MgCl<sub>2</sub>, pH 7.4)  
863 bubbled with 100% O<sub>2</sub>. Rhod-2 AM (30  $\mu$ M in aCSF, dissolved in 0.2% DMSO; 0.006% Pluronic  
864 Acid; 0.0002% Cremophore EL) was incubated on the brain surface for 45 min. Animals were  
865 then injected with a maintenance dose of buprenorphin (0.02mg/kg) and a low dose of  
866 subcutaneous chlorprothixene (0.5-1 mg/kg body weight) to transition anesthesia to light sedation  
867 as isoflurane was discontinued (Bonder et al., 2014 J Neurosci). Subsequently, 0.2 mL 5% FITC  
868 dextran solution was injected into the tail vein. The animals were then transferred to the imaging  
869 rig on a heating pad and head-fixed for 2-photon imaging. Temperature was monitored with a  
870 rectal thermometer and was set to 36°C. The cranial window was continuously superfused with a  
871 bicarbonate based aCSF (in mM: 2.5 KCl, 126 NaCl, 25 NaHCO<sub>3</sub>, 1.3 CaCl<sub>2</sub>, 1.2 MgCl<sub>2</sub>, 1.25  
872 NaH<sub>2</sub>PO<sub>4</sub>, and 10 glucose) bubbled with carbogen (95% O<sub>2</sub>, 5% CO<sub>2</sub>) at a rate of 2ml/min. Imaging  
873 started ~30 min later when the animals were awake and stationary but responsive to touch or  
874 startle. Mice were continuously monitored by an infrared camera and an LED light. Additional  
875 chlorprothixene (0.2-0.4 mg/kg) was injected if any movement was detected. A 16x (Nikon, 0.9NA)  
876 water-immersion objective was positioned square to the surface of the window. Imaging was  
877 performed at 0.5 Hz over one of the open holes 40-80  $\mu$ m below the surface. Rhod-2 AM only  
878 loaded astrocytes in mice *in vivo* (Tran et al., 2018 Neuron). After 5 min of baseline recording,  
879 standard 2.5 mM K<sup>+</sup>-containing aCSF was switched to a 10 mM K<sup>+</sup>-based aCSF (in mM: 10 KCl,  
880 118.5 NaCl, 25 NaHCO<sub>3</sub>, 1.3 CaCl<sub>2</sub>, 1.2 MgCl<sub>2</sub>, 1.25 NaH<sub>2</sub>PO<sub>4</sub>, and 10 glucose) for 20 min, where  
881 Na<sup>+</sup> was replaced by the excess K<sup>+</sup> to maintain osmolality.

882

## 883 **QUANTIFICATION AND STATISTICAL ANALYSIS**

884 Rhod-2 and Calcein trace data were independently normalized ( $F = F1/F0$ ) – where F is  
885 fluorescence, 1 is any given time point and 0 is an average baseline value – followed by a ratio  
886 of the two ( $F_{\text{Rhod-2}}/F_{\text{Calcein}}$ ). Regions of interest (astrocyte somata, major process or endfeet) were  
887 chosen manually and adjusted in xy position throughout the time series manually if required.  
888 Quantification of arteriole tone changes in brain slices were performed in ImageJ. The arteriole

889 lumen was loaded with FITC-dextran and the luminal area was calculated in every frame for a  
890 section of arteriole representative of vessel's tone change.

891

## 892 **Data Collection and Statistics**

893 In a given experiment, if more than one astrocyte was imaged in the field of view (typical) the  
894 normalized ratios from each were averaged together for an 'n' of 1. Thus, each experiment,  
895 conducted on an independent brain slice constituted a statistical 'n' and all data sets used at  
896 least N=3 animals. We plotted the average decrease (mean +/- SEM) in the Rhod-2/Calcein  
897 ratio for the entire time series and also quantified the peak decrease of individual experiments  
898 for bar graphs. Imaging data were stored on a computer for off-line analysis using ImageJ and  
899 Graphpad Prism (Version 6). Experimental values are presented as mean  $\pm$  SEM; statistical  
900 analyses were performed using two-tailed student's t-test (paired or unpaired as appropriate) or  
901 a one-way ANOVA when comparing multiple groups. Values of  $p < 0.05$  were accepted as  
902 statistically significant (\* =  $p < 0.05$ , \*\* =  $p < 0.01$ , \*\*\* =  $p < 0.001$ , \*\*\*\* =  $p < 0.0001$ ).

903

904

905

## 906 **KEY RESOURCES TABLE**

| REAGENT or RESOURCE                                    | SOURCE                   | IDENTIFIER      |
|--------------------------------------------------------|--------------------------|-----------------|
| Biological samples                                     |                          |                 |
| Acute, living brain slices from mouse and rat          | This paper               | n/a             |
| Living neocortical brain tissue under a cranial window | This paper               | n/a             |
| Chemicals, peptides, and recombinant proteins          |                          |                 |
| Calcein/AM                                             | Biotium                  | Cat# 80011      |
| Rhod-2/AM                                              | Biotium                  | Cat# 50024      |
| Sulforhodamine 101                                     | Millipore Sigma          | SKU S7635       |
| Oregon Green BAPTA-1 hexapotassium salt                | Thermo Fisher Scientific | Cat# O6806      |
| Tetrodotoxin (citrate)                                 | Alomone Labs             | Cat# T550       |
| Thapsigargin                                           | Tocris Bioscience        | Cat# 1138       |
| BaCl <sub>2</sub>                                      | Sigma                    | Cat# 10361-37-2 |
| Acetylzolamide                                         | Tocris Bioscience        | Cat# 6742       |
| NPPB                                                   | Tocris Bioscience        | Cat# 0593       |
| VU-0240551                                             | Tocris Bioscience        | Cat# 3888       |
| Bumetanide                                             | Tocris Bioscience        | Cat# 3108       |
| S0859                                                  | Millipore Sigma          | SKU SML0638     |
| KH7                                                    | Tocris Bioscience        | Cat# 3834       |
| SC-560                                                 | Tocris Bioscience        | Cat# 1550       |
| SC-58125                                               | Tocris Bioscience        | Cat# 2895       |
| L-NAME hydrochloride                                   | Tocris Bioscience        | Cat# 0665       |

|                                                  |                          |                                                                                                                                                                                             |
|--------------------------------------------------|--------------------------|---------------------------------------------------------------------------------------------------------------------------------------------------------------------------------------------|
| Alexa Fluor 488 hydrazide                        | Thermo Fisher Scientific | Cat# A-10436                                                                                                                                                                                |
| FITC-dextran 2000KDa                             | Sigma Aldrich            | Cat# FD2000S-5G                                                                                                                                                                             |
| U-46619                                          | Cayman Chemical          | Cat# 56985-40-1                                                                                                                                                                             |
| Deposited data                                   |                          |                                                                                                                                                                                             |
| None, but fulfilled upon request by lead contact |                          |                                                                                                                                                                                             |
| Experimental models: Organisms/strains           |                          |                                                                                                                                                                                             |
| Mouse: C57BL/6                                   | Charles River            | <a href="https://www.criver.com/products-services/find-model/c57bl6-mouse?region=24">https://www.criver.com/products-services/find-model/c57bl6-mouse?region=24</a>                         |
| Rat: genotype Sprague Dawley Rat                 | Charles River            | <a href="https://www.criver.com/products-services/find-model/sas-sprague-dawley-rat?region=3611">https://www.criver.com/products-services/find-model/sas-sprague-dawley-rat?region=3611</a> |
| Software and algorithms                          |                          |                                                                                                                                                                                             |
| ScanImage                                        | Vidrio Technologies      | <a href="https://vidriotechnologies.com/">https://vidriotechnologies.com/</a>                                                                                                               |
| GraphPad Prism                                   | GraphPad Software Inc.   | <a href="https://www.graphpad.com/scientific-software/prism/RRID:SCR_002798">https://www.graphpad.com/scientific-software/prism/RRID:SCR_002798</a>                                         |
| ImageJ                                           | NIH                      | <a href="https://imagej.nih.gov/ij/RRID:SCR_003070">https://imagej.nih.gov/ij/RRID:SCR_003070</a>                                                                                           |
| FIJI                                             | NIH                      | <a href="http://fiji.sc">http://fiji.sc</a><br>RRID:SCR_002285                                                                                                                              |
| Other                                            |                          |                                                                                                                                                                                             |
| Custom perforated cover glass                    | Laser MicroMaching Ltd   | <a href="http://www.lasermicromachining.com">http://www.lasermicromachining.com</a><br>Design available upon request                                                                        |
| Custom titanium head-bar                         | Gordon Lab               | Design available upon request                                                                                                                                                               |
| Custom air supported treadmill                   | (Tran et al., 2015)      | n/a                                                                                                                                                                                         |



908 **Citations**

- 909 Agarwal A, Wu P-H, Hughes EG, Fukaya M, Tischfield MA, Langseth AJ, Wirtz D, Bergles DE  
910 (2017) Transient Opening of the Mitochondrial Permeability Transition Pore Induces  
911 Microdomain Calcium Transients in Astrocyte Processes. *Neuron* 93:587–605.e587.
- 912 Alkayed NJ, Birks EK, Hudetz AG, Roman RJ, Henderson L, Harder DR (1996a) Inhibition of  
913 brain P-450 arachidonic acid epoxygenase decreases baseline cerebral blood flow. *Am J*  
914 *Physiol* 271:H1541–H1546.
- 915 Alkayed NJ, Narayanan J, Gebremedhin D, Medhora M, Roman RJ, Harder DR (1996b)  
916 Molecular characterization of an arachidonic acid epoxygenase in rat brain astrocytes.  
917 *Stroke* 27:971–979.
- 918 Attwell D, Buchan AM, Charpak S, Lauritzen M, MacVicar BA, Newman EA (2010) Glial and  
919 neuronal control of brain blood flow. *Nature* 468:232–243.
- 920 Biesecker KR, Srienc AI, Shimoda AM, Agarwal A, Bergles DE, Kofuji P, Newman EA (2016)  
921 Glial Cell Calcium Signaling Mediates Capillary Regulation of Blood Flow in the Retina. *J*  
922 *Neurosci* 36:9435–9445.
- 923 Bonder DE, McCarthy KD (2014) Astrocytic Gq-GPCR-linked IP3R-dependent Ca<sup>2+</sup> signaling  
924 does not mediate neurovascular coupling in mouse visual cortex in vivo. *J Neurosci*  
925 34:13139–13150.
- 926 BRINLEY FJ, KANDEL ER, MARSHALL WH (1960) Potassium outflux from rabbit cortex during  
927 spreading depression. *J Neurophysiol* 23:246–256.
- 928 Cahoy JD, Emery B, Kaushal A, Foo LC, Zamanian JL, Christopherson KS, Xing Y, Lubischer  
929 JL, Krieg PA, Krupenko SA, Thompson WJ, Barres BA (2008) A transcriptome database for  
930 astrocytes, neurons, and oligodendrocytes: a new resource for understanding brain  
931 development and function. *J Neurosci* 28:264–278.
- 932 Chever O, Djukic B, McCarthy KD, Amzica F (2010) Implication of Kir4.1 channel in excess  
933 potassium clearance: an in vivo study on anesthetized glial-conditional Kir4.1 knock-out  
934 mice. *J Neurosci* 30:15769–15777.
- 935 Choi HB, Gordon GRJ, Zhou N, Tai C, Rungta RL, Martinez J, Milner TA, Ryu JK, McLarnon  
936 JG, Tresguerres M, Levin LR, Buck J, MacVicar BA (2012) Metabolic communication  
937 between astrocytes and neurons via bicarbonate-responsive soluble adenylyl cyclase.  
938 *Neuron* 75:1094–1104.
- 939 Dallwig R, Vitten H, Deitmer JW (2000) A novel barium-sensitive calcium influx into rat  
940 astrocytes at low external potassium. *Cell Calcium* 28:247–259.
- 941 Ding F, O'Donnell J, Xu Q, Kang N, Goldman N, Nedergaard M (2016) Changes in the  
942 composition of brain interstitial ions control the sleep-wake cycle. *Science* 352:550–555.
- 943 Duffy S, MacVicar BA (1994) Potassium-dependent calcium influx in acutely isolated  
944 hippocampal astrocytes. *Neuroscience* 61:51–61.
- 945 Dutta AK, Korchev YE, Shevchuk AI, Hayashi S, Okada Y, Sabirov RZ (2008) Spatial

- 946 distribution of maxi-anion channel on cardiomyocytes detected by smart-patch technique.  
947 *Biophys J* 94:1646–1655.
- 948 Endo Y, Jinnai K, Endo M, Fujita K, Kimura F (1990) Diurnal variation of cerebral blood flow in  
949 rat hippocampus. *Stroke* 21:1464–1469.
- 950 Ernest NJ, Weaver AK, Van Duyn LB, Sontheimer HW (2005) Relative contribution of chloride  
951 channels and transporters to regulatory volume decrease in human glioma cells. *Am J*  
952 *Physiol, Cell Physiol* 288:C1451–C1460.
- 953 Farrell JS, Gaxiola-Valdez I, Wolff MD, David LS, Dika HI, Geeraert BL, Rachel Wang X, Singh  
954 S, Spanswick SC, Dunn JF, Antle MC, Federico P, Teskey GC (2016) Postictal behavioural  
955 impairments are due to a severe prolonged hypoperfusion/hypoxia event that is COX-2  
956 dependent. *Elife* 5.
- 957 Filosa JA (2004) Calcium Dynamics in Cortical Astrocytes and Arterioles During Neurovascular  
958 Coupling. *Circulation Research* 95:e73–e81.
- 959 Filosa JA, Bonev AD, Straub SV, Meredith AL, Wilkerson MK, Aldrich RW, Nelson MT (2006)  
960 Local potassium signaling couples neuronal activity to vasodilation in the brain. *Nat*  
961 *Neurosci* 9:1397–1403.
- 962 Florence CM, Baillie LD, Mulligan SJ (2012) Dynamic volume changes in astrocytes are an  
963 intrinsic phenomenon mediated by bicarbonate ion flux. *PLoS ONE* 7:e51124.
- 964 Fraser DD, Mudrick-Donnon LA, MacVicar BA (1994) Astrocytic GABA receptors. *Glia* 11:83–  
965 93.
- 966 Gagnon KBE, Adragna NC, Fyffe REW, Lauf PK (2007) Characterization of glial cell K-Cl  
967 cotransport. *Cell Physiol Biochem* 20:121–130.
- 968 Gillen CM, Forbush B (1999) Functional interaction of the K-Cl cotransporter (KCC1) with the  
969 Na-K-Cl cotransporter in HEK-293 cells. *Am J Physiol* 276:C328–C336.
- 970 Girouard H, Bonev AD, Hannah RM, Meredith A, Aldrich RW, Nelson MT (2010) Astrocytic  
971 endfoot Ca<sup>2+</sup> and BK channels determine both arteriolar dilation and constriction. *Proc Natl*  
972 *Acad Sci USA* 107:3811–3816.
- 973 Gordon GRJ, Choi HB, Rungta RL, Ellis-Davies GCR, MacVicar BA (2008) Brain metabolism  
974 dictates the polarity of astrocyte control over arterioles. *Nature* 456:745–749.
- 975 GRAFSTEIN B (1956) Mechanism of spreading cortical depression. *J Neurophysiol* 19:154–  
976 171.
- 977 Hertz L, Song D, Xu J, Peng L, Gibbs ME (2015) Role of the Astrocytic Na(+), K(+)-ATPase in  
978 K(+) Homeostasis in Brain: K(+) Uptake, Signaling Pathways and Substrate Utilization.  
979 *Neurochem Res* 40:2505–2516.
- 980 Horiuchi T, Dietrich HH, Hongo K, Dacey RG (2002) Mechanism of extracellular K<sup>+</sup>-induced  
981 local and conducted responses in cerebral penetrating arterioles. *Stroke* 33:2692–2699.

- 982 Hotson JR, Sybert GW, Ward AA (1973) Extracellular potassium concentration changes during  
983 propagated seizures in neocortex. *Exp Neurol* 38:20–26.
- 984 Huang WC, Xiao S, Huang F, Harfe BD, Jan YN, Jan LY (2012) Calcium-activated chloride  
985 channels (CaCCs) regulate action potential and synaptic response in hippocampal neurons.  
986 *Neuron* 74:179–192.
- 987 Inoue H, Okada Y (2007) Roles of volume-sensitive chloride channel in excitotoxic neuronal  
988 injury. *J Neurosci* 27:1445–1455.
- 989 Jennings A, Tyurikova O, Bard L, Zheng K, Semyanov A, Henneberger C, Rusakov D (2017)  
990 Dopamine elevates and lowers astroglial Ca<sup>2+</sup> through distinct pathways depending on  
991 local synaptic circuitry. *Glia* 65(3):447–459.
- 992 Joshi I, Andrew RD (2001) Imaging anoxic depolarization during ischemia-like conditions in the  
993 mouse hemi-brain slice. *J Neurophysiol* 85:414–424.
- 994 Kelly JP, Van Essen DC (1974) Cell structure and function in the visual cortex of the cat. *J*  
995 *Physiol (Lond)* 238:515–547.
- 996 Kim KJ, Iddings JA, Stern JE, Blanco VM, Croom D, Kirov SA, Filosa JA (2015) Astrocyte  
997 contributions to flow/pressure-evoked parenchymal arteriole vasoconstriction. *J Neurosci*  
998 35:8245–8257.
- 999 Kofuji P, Newman EA (2004) Potassium buffering in the central nervous system. *Neuroscience*  
1000 129:1045–1056.
- 1001 Koivisto A, Chapman H, Jalava N, Korjamo T, Saarnilehto M, Lindstedt K, Pertovaara A (2014)  
1002 TRPA1: a transducer and amplifier of pain and inflammation. *Basic Clin Pharmacol Toxicol*  
1003 114:50–55.
- 1004 Korytová H (1977) Arousal-induced increase of cortical [K<sup>+</sup>] in unrestrained rats. *Experientia*  
1005 33:242–244.
- 1006 Kur J, Newman EA (2014) Purinergic control of vascular tone in the retina. *J Physiol (Lond)*  
1007 592:491–504.
- 1008 Kyzozis A, Reichling DB (1995) Perforated-patch recording with gramicidin avoids artifactual  
1009 changes in intracellular chloride concentration. *J Neurosci Methods* 57:27–35.
- 1010 Larsen BR, MacAulay N (2017) Activity-dependent astrocyte swelling is mediated by pH-  
1011 regulating mechanisms. *Glia* 65:1668–1681.
- 1012 Lecrux C, Kocharyan A, Sandoe CH, Tong X-K, Hamel E (2012) Pyramidal cells and  
1013 cytochrome P450 epoxygenase products in the neurovascular coupling response to basal  
1014 forebrain cholinergic input. *J Cereb Blood Flow Metab* 32:896–906.
- 1015 Lee S, Yoon B-E, Berglund K, Oh S-J, Park H, Shin H-S, Augustine GJ, Lee CJ (2010)  
1016 Channel-mediated tonic GABA release from glia. *Science* 330:790–796.
- 1017 Liu H-T, Toychiev AH, Takahashi N, Sabirov RZ, Okada Y (2008) Maxi-anion channel as a

- 1018 candidate pathway for osmosensitive ATP release from mouse astrocytes in primary  
1019 culture. *Cell Res* 18:558–565.
- 1020 Liu X, Li C, Falck JR, Harder DR, Koehler RC (2012) Relative contribution of cyclooxygenases,  
1021 epoxyeicosatrienoic acids, and pH to the cerebral blood flow response to vibrissal  
1022 stimulation. *Am J Physiol Heart Circ Physiol* 302:H1075–H1085.
- 1023 Longden TA, Dabertrand F, Hill-Eubanks DC, Hammack SE, Nelson MT (2014) Stress-induced  
1024 glucocorticoid signaling remodels neurovascular coupling through impairment of  
1025 cerebrovascular inwardly rectifying K<sup>+</sup> channel function. *Proc Natl Acad Sci USA* 111:7462–  
1026 7467.
- 1027 Longden TA, Dabertrand F, Koide M, Gonzales AL, Tykocki NR, Brayden JE, Hill-Eubanks D,  
1028 Nelson MT (2017) Capillary K<sup>+</sup>-sensing initiates retrograde hyperpolarization to increase  
1029 local cerebral blood flow. *Nat Neurosci* 20:717–726.
- 1030 Ma B, Xu G, Wang W, Enyeart JJ, Zhou M (2014) Dual patch voltage clamp study of low  
1031 membrane resistance astrocytes in situ. *Mol Brain* 7:18.
- 1032 Mathiisen TM, Lehre KP, Danbolt NC, Ottersen OP (2010) The perivascular astroglial sheath  
1033 provides a complete covering of the brain microvessels: an electron microscopic 3D  
1034 reconstruction. *Glia* 58:1094–1103.
- 1035 Mehina EMF, Murphy-Royal C, Gordon GR (2017) Steady-State Free Ca<sup>2+</sup> in Astrocytes Is  
1036 Decreased by Experience and Impacts Arteriole Tone. *J Neurosci* 37:8150–8165.
- 1037 Metea MR, Kofuji P, Newman EA (2007) Neurovascular coupling is not mediated by potassium  
1038 siphoning from glial cells. *J Neurosci* 27:2468–2471.
- 1039 Mishra A, Reynolds JP, Chen Y, Gourine AV, Rusakov DA, Attwell D (2016) Astrocytes mediate  
1040 neurovascular signaling to capillary pericytes but not to arterioles. *Nat Neurosci* 19:1619–  
1041 1627.
- 1042 Mulligan SJ, MacVicar BA (2004) Calcium transients in astrocyte endfeet cause cerebrovascular  
1043 constrictions. *Nature* 431:195–199.
- 1044 Mulligan SJ, MacVicar BA (2006) VRACs CARVe a path for novel mechanisms of  
1045 communication in the CNS. *Sci STKE* 2006:pe42.
- 1046 Nilsson M, Eriksson PS, Rönnbäck L, Hansson E (1993) GABA induces Ca<sup>2+</sup> transients in  
1047 astrocytes. *Neuroscience* 54:605–614.
- 1048 Nizar K et al. (2013) In vivo stimulus-induced vasodilation occurs without IP<sub>3</sub> receptor activation  
1049 and may precede astrocytic calcium increase. *J Neurosci* 33:8411–8422.
- 1050 Panatier A, Vallée J, Haber M, Murai KK, Lacaille J-C, Robitaille R (2011) Astrocytes are  
1051 endogenous regulators of basal transmission at central synapses. *Cell* 146:785–798.
- 1052 Parpura V, Haydon PG (2000) Physiological astrocytic calcium levels stimulate glutamate  
1053 release to modulate adjacent neurons. *Proc Natl Acad Sci USA* 97:8629–8634.

- 1054 Payne JA, Rivera C, Voipio J, Kaila K (2003) Cation-chloride co-transporters in neuronal  
1055 communication, development and trauma. *Trends Neurosci* 26:199–206.
- 1056 Pellerin L, Magistretti PJ (1994) Glutamate uptake into astrocytes stimulates aerobic glycolysis:  
1057 a mechanism coupling neuronal activity to glucose utilization. *Proc Natl Acad Sci USA*  
1058 91:10625–10629.
- 1059 Pusch M, Jentsch TJ (1994) Molecular physiology of voltage-gated chloride channels. *Physiol*  
1060 *Rev* 74:813–827.
- 1061 Ransom CB, Ransom BR, Sontheimer H (2000) Activity-dependent extracellular K<sup>+</sup>  
1062 accumulation in rat optic nerve: the role of glial and axonal Na<sup>+</sup> pumps. *J Physiol (Lond)*  
1063 522:427–442.
- 1064 Ringel F, Plesnila N (2008) Expression and functional role of potassium-chloride cotransporters  
1065 (KCC) in astrocytes and C6 glioma cells. *Neurosci Lett* 442:219–223.
- 1066 Rosenegger DG, Tran CHT, LeDue J, Zhou N, Gordon GR (2014) A high performance, cost-  
1067 effective, open-source microscope for scanning two-photon microscopy that is modular and  
1068 readily adaptable. *PLoS ONE* 9:e110475.
- 1069 Rosenegger DG, Tran CHT, Wamsteeker Cusulin JI, Gordon GR (2015) Tonic Local Brain  
1070 Blood Flow Control by Astrocytes Independent of Phasic Neurovascular Coupling. *J*  
1071 *Neurosci* 35:13463–13474.
- 1072 Rungta RL, Bernier L-P, Dissing-Olesen L, Groten CJ, LeDue JM, Ko R, Drissler S, MacVicar  
1073 BA (2016) Ca<sup>2+</sup> transients in astrocyte fine processes occur via Ca<sup>2+</sup> influx in the adult  
1074 mouse hippocampus. *Glia* 64:2093–2103.
- 1075 Rungta RL, Choi HB, Tyson JR, Malik A, Dissing-Olesen L, Lin PJC, Cain SM, Cullis PR,  
1076 Snutch TP, MacVicar BA (2015) The cellular mechanisms of neuronal swelling underlying  
1077 cytotoxic edema. *Cell* 161:610–621.
- 1078 Shigetomi E, Bushong EA, Haustein MD, Tong X, Jackson-Weaver O, Kracun S, Xu J,  
1079 Sofroniew MV, Ellisman MH, Khakh BS (2013a) Imaging calcium microdomains within  
1080 entire astrocyte territories and endfeet with GCaMPs expressed using adeno-associated  
1081 viruses. *J Gen Physiol* 141:633–647.
- 1082 Shigetomi E, Jackson-Weaver O, Huckstepp RT, O'Dell TJ, Khakh BS (2013b) TRPA1 channels  
1083 are regulators of astrocyte basal calcium levels and long-term potentiation via constitutive  
1084 D-serine release. *J Neurosci* 33:10143–10153.
- 1085 Shigetomi E, Tong X, Kwan KY, Corey DP, Khakh BS (2012) TRPA1 channels regulate  
1086 astrocyte resting calcium and inhibitory synapse efficacy through GAT-3. *Nat Neurosci*  
1087 15:70–80.
- 1088 Singer W, Lux HD (1975) Extracellular potassium gradients and visual receptive fields in the cat  
1089 striate cortex. *Brain Res* 96:378–383.
- 1090 So PTC, Dong CY, Masters BR, Berland KM (2000) T WO-P HOTONE XCITATIONF  
1091 LUORESCENCEM ICROSCOPY. *Annu Rev Biomed Eng* 2:399–429.

- 1092 Somjen GG (1979) Extracellular potassium in the mammalian central nervous system. *Annu*  
1093 *Rev Physiol* 41:159–177.
- 1094 Sotelo-Hitschfeld T et al. (2015) Channel-mediated lactate release by K<sup>+</sup>-stimulated astrocytes.  
1095 *J Neurosci* 35:4168–4178.
- 1096 Srinivasan R, Huang BS, Venugopal S, Johnston AD, Chai H, Zeng H, Golshani P, Khakh BS  
1097 (2015) Ca(2+) signaling in astrocytes from Ip3r2(-/-) mice in brain slices and during startle  
1098 responses in vivo. *Nat Neurosci* 18:708–717.
- 1099 Staley KJ, Proctor WR (1999) Modulation of mammalian dendritic GABA(A) receptor function by  
1100 the kinetics of Cl<sup>-</sup> and HCO<sub>3</sub><sup>-</sup> transport. *J Physiol (Lond)* 519 Pt 3:693–712.
- 1101 Steinhauser C, Berger T, Frotscher M, Kettenmann H (1992) Heterogeneity in the Membrane  
1102 Current Pattern of Identified Glial Cells in the Hippocampal Slice. *Eur J Neurosci* 4:472–  
1103 484.
- 1104 Straub SV, Bonev AD, Wilkerson MK, Nelson MT (2006) Dynamic inositol trisphosphate-  
1105 mediated calcium signals within astrocytic endfeet underlie vasodilation of cerebral  
1106 arterioles. *J Gen Physiol* 128:659–669.
- 1107 Syková E, Rothenberg S, Krekule I (1974) Changes of extracellular potassium concentration  
1108 during spontaneous activity in the mesencephalic reticular formation of the rat. *Brain Res*  
1109 79:333–337.
- 1110 Takano T, Tian GF, Peng W, Lou N, Libionka W, Han X, Nedergaard M (2006) Astrocyte-  
1111 mediated control of cerebral blood flow. *Nat Neurosci* 9:260–267.
- 1112 Takata N, Nagai T, Ozawa K, Oe Y, Mikoshiba K, Hirase H (2013) Cerebral blood flow  
1113 modulation by Basal forebrain or whisker stimulation can occur independently of large  
1114 cytosolic Ca<sup>2+</sup> signaling in astrocytes. *PLoS ONE* 8:e66525.
- 1115 van Mil HG, Geukes Foppen RJ, Siegenbeek van Heukelom J (1997) The influence of  
1116 bumetanide on the membrane potential of mouse skeletal muscle cells in isotonic and  
1117 hypertonic media. *Br J Pharmacol* 120:39–44.
- 1118 Wang T, Yang Y-Q, Karasawa T, Wang Q, Phillips A, Guan B-C, Ma K-T, Jiang M, Xie D-H,  
1119 Steyger PS, Jiang Z-G (2013) Bumetanide hyperpolarizes madin-darby canine kidney cells  
1120 and enhances cellular gentamicin uptake by elevating cytosolic Ca(2+) thus facilitating  
1121 intermediate conductance Ca(2+)-activated potassium channels. *Cell Biochem Biophys*  
1122 65:381–398.
- 1123 Yoon B-E, Jo S, Woo J, Lee J-H, Kim T, Kim D, Lee CJ (2011) The amount of astrocytic GABA  
1124 positively correlates with the degree of tonic inhibition in hippocampal CA1 and cerebellum.  
1125 *Mol Brain* 4:42.
- 1126 Young SZ, Platel JC, Nielsen JV, Jensen NA, Bordey A (2010) GABA(A) Increases Calcium in  
1127 Subventricular Zone Astrocyte-Like Cells Through L- and T-Type Voltage-Gated Calcium  
1128 Channels. *Front Cell Neurosci* 4:8.
- 1129 Zhang Y, Chen K, Sloan SA, Bennett ML, Scholze AR, O’Keeffe S, Phatnani HP, Guarnieri P,

- 1130 Caneda C, Ruderisch N, Deng S, Liddelow SA, Zhang C, Daneman R, Maniatis T, Barres  
1131 BA, Wu JQ (2014) An RNA-sequencing transcriptome and splicing database of glia,  
1132 neurons, and vascular cells of the cerebral cortex. *J Neurosci* 34:11929–11947.
- 1133 Zhao B, Gu L, Liu K, Zhang M, Liu H (2017) Maxi-anion channels play a key role in glutamate-  
1134 induced ATP release from mouse astrocytes in primary culture. *Neuroreport* 28:380–385.
- 1135 Zheng K, Bard L, Reynolds JP, King C, Jensen TP, Gourine AV, Rusakov DA (2015) Time-  
1136 Resolved Imaging Reveals Heterogeneous Landscapes of Nanomolar Ca(2+) in Neurons  
1137 and Astroglia. *Neuron* 88:277–288.
- 1138 Zhou M, Xu G, Xie M, Zhang X, Schools GP, Ma L, Kimelberg HK, Chen H (2009) TWIK-1 and  
1139 TREK-1 are potassium channels contributing significantly to astrocyte passive conductance  
1140 in rat hippocampal slices. *J Neurosci* 29:8551–8564.
- 1141 Zhou N, Gordon GRJ, Feighan D, MacVicar BA (2010) Transient swelling, acidification, and  
1142 mitochondrial depolarization occurs in neurons but not astrocytes during spreading  
1143 depression. *Cereb Cortex* 20:2614–2624.
- 1144 Zonta M, Angulo MC, Gobbo S, Rosengarten B, Hossmann KA, Pozzan T, Carmignoto G  
1145 (2003) Neuron-to-astrocyte signaling is central to the dynamic control of brain  
1146 microcirculation. *Nat Neurosci* 6:43–50.
- 1147  
1148  
1149  
1150  
1151  
1152  
1153  
1154  
1155  
1156  
1157  
1158  
1159  
1160  
1161  
1162  
1163  
1164  
1165  
1166  
1167  
1168  
1169  
1170  
1171  
1172  
1173  
1174

1175 **Supplementary text and figures**

1176  
1177  
1178  
1179  
1180  
1181  
1182  
1183  
1184  
1185  
1186  
1187  
1188  
1189  
1190  
1191  
1192  
1193  
1194  
1195

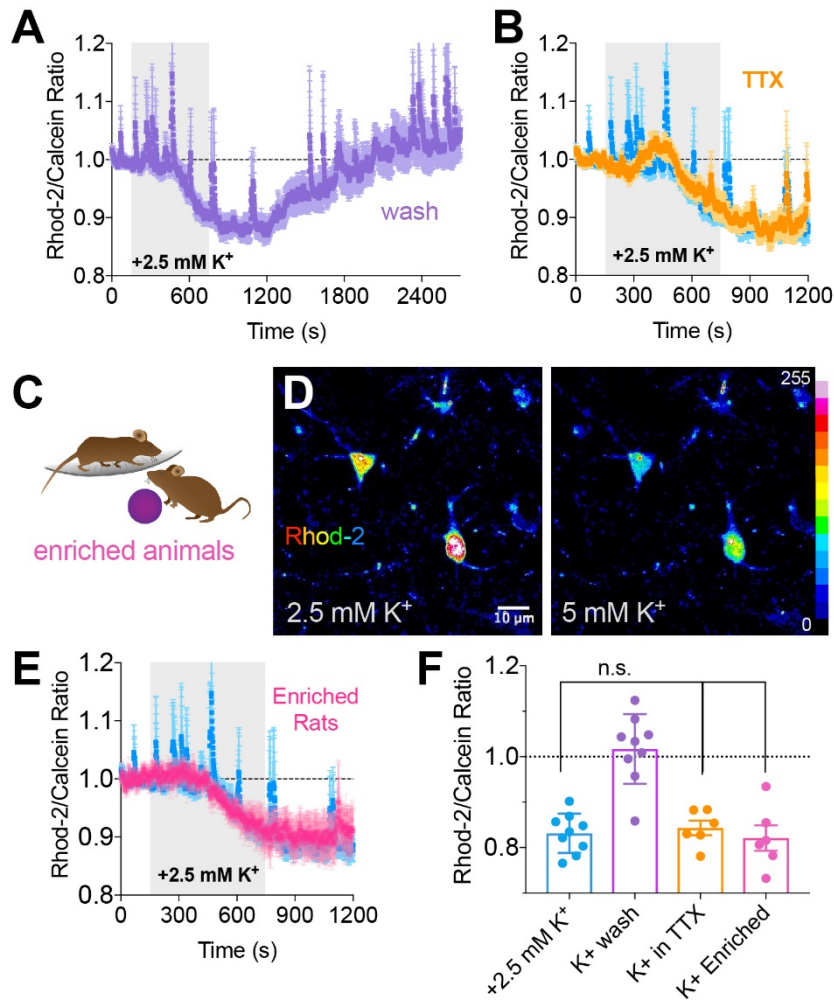

1196 **Supplementary Figure 1: The high K<sup>+</sup> mediated decrease in astrocyte Ca<sup>2+</sup> neither**  
1197 **exhibits a reliance on neural firing nor displays plastic changes.**

1198 **A)** Average summary time series Rhod-2/Calcein ratio data showing that the decrease  
1199 in astrocyte Ca<sup>2+</sup> caused by a +2.5mM K<sup>+</sup> challenge recovers completely upon return  
1200 to the baseline K<sup>+</sup> level. **B)** The decrease in astrocyte Ca<sup>2+</sup> caused by high K<sup>+</sup> still occurs  
1201 when action potential signaling is blocked by TTX. **C)** Cartoon depicting animals that  
1202 received 3 weeks of enrichment. **D)** Pseudo coloured images of Rhod-2 astrocytes  
1203 from enriched animals showing the decrease in Ca<sup>2+</sup> signal in response to a K<sup>+</sup>  
1204 challenge. **E)** Average summary time series of the Rhod-2/Calcein ratio from enriched  
1205 animals in response to high K<sup>+</sup> (pink) compared to animals under standard housing  
1206 (blue). **F)** Summary data of the maximal decrease in astrocyte Ca<sup>2+</sup> in each experiment.  
1207 Data is mean +/- SEM, 'TTX' and 'Enriched' are unpaired two-tailed t-tests to control  
1208 condition.



1209

1210

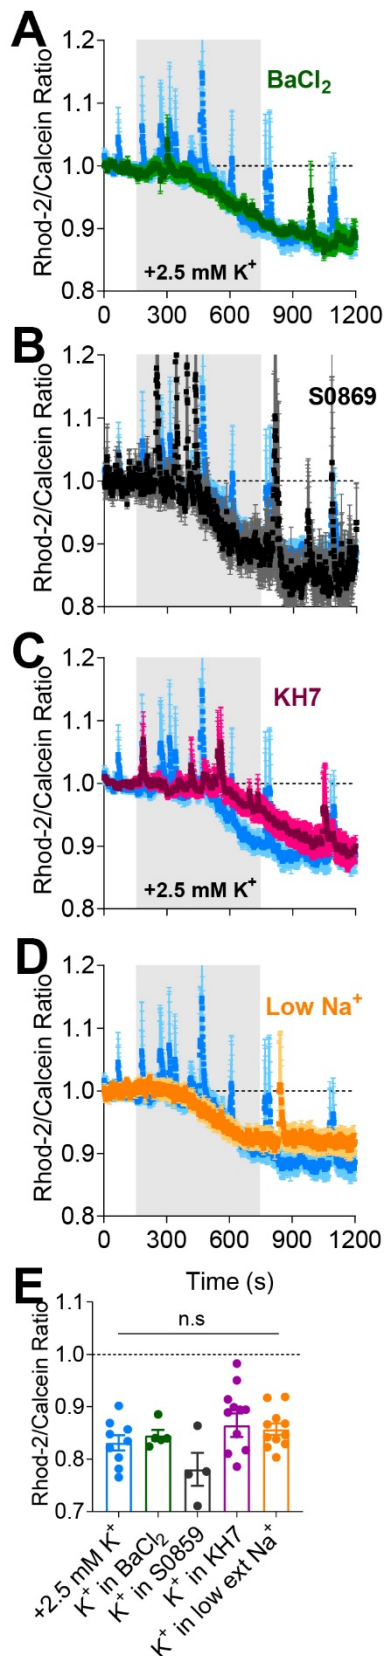

**Supplementary Figure 2: The K<sup>+</sup> mediated Ca<sup>2+</sup> decrease does not depend on inward rectifiers, the SCL4A4-sAC pathway or Na<sup>+</sup> ions.**

**A-D)** Average summary time series of Rhod-2/Calcein ratio Ca<sup>2+</sup> data showing no effect on the K<sup>+</sup>-mediated decrease when antagonizing inward rectifying potassium channels with BaCl<sub>2</sub> (100 μM)(A), blocking SLCaA4 with S0589 (100 μM) (B), antagonizing soluble adenylyl cyclase using KH7 (30 μM) (C), or lowering external Na<sup>+</sup> to 26.25mM (D).

**E)** Summary data of the maximal decrease in astrocyte Ca<sup>2+</sup> in each experiment. Data are mean +/- SEM, unpaired two-tailed t-tests to the control condition.
